32 **Abstract**

33 Effects of parental environment on offspring traits have been well known for decades. Interest in  
34 this transgenerational form of phenotypic plasticity has recently surged due to advances in our  
35 understanding of its mechanistic basis. Theoretical research has simultaneously advanced by  
36 predicting the environmental conditions that should favor the adaptive evolution of transgenerational  
37 plasticity. Yet whether such conditions actually exist in nature remains largely unexplored. Here,  
38 using long-term climate data, we modeled optimal levels of transgenerational plasticity for an  
39 organism with a one-year life cycle at a spatial resolution of 4km<sup>2</sup> across the continental US. Both  
40 annual temperature and precipitation levels were often autocorrelated, but the strength and direction  
41 of these autocorrelations varied considerably across the continental US and even among nearby sites.  
42 When present, such environmental autocorrelations render offspring environments statistically  
43 predictable based on the parental environment, a key condition for the adaptive evolution of  
44 transgenerational plasticity. Results of our optimality models were consistent with this prediction:  
45 high levels of transgenerational plasticity were favored at sites with strong environmental  
46 autocorrelations, and little-to-no transgenerational plasticity was favored at sites with weak or non-  
47 existent autocorrelations. These results are among the first to show that natural patterns of  
48 environmental variation favor the evolution of adaptive transgenerational plasticity. Furthermore,  
49 these findings suggest that transgenerational plasticity is highly variable in nature, depending on site-  
50 specific patterns of environmental variation.

51

52

53 Keywords: Transgenerational plasticity, epigenetics, local adaptation, climatic oscillations

54

55

56

57

58

59

60

61

62

## 63 Introduction

64 Natural selection can produce adaptation only if the selective environment is reliably  
65 encountered over generations, or in other words, if selective environments are statistically  
66 predictable. Early models of evolution envisioned fitness landscapes that were static, such that  
67 populations adapt over the course of generations to one or another environment (Fisher 1930).  
68 While this form of adaptation optimizes phenotypes in homogenous environments, the more realistic  
69 scenario of environmental heterogeneity in both space and time limits the adaptive value of such  
70 constitutive genetic expression (Sultan 2015). In variable environments, the capacity to modify  
71 phenotypes in response to predictive environmental cues allows organisms to match their traits to  
72 the specific patch of habitat in which they find themselves, a phenomenon termed adaptive within-  
73 generation plasticity (Ghalambor et al. 2007; Nicotra et al. 2010). Investigating the predictability of  
74 environmental cues in nature is therefore a major research goal in ecology and evolution.

75 Over the last three decades, it has become clear that effects of parental environments on  
76 offspring phenotypes (i.e., *transgenerational plasticity*) are remarkably common (reviewed by (Mousseau  
77 and Fox 1998; Uller 2008; Bonduriansky and Day 2009; Holeski et al. 2012; Conrath et al. 2015;  
78 Sultan 2015). For instance, when *Mimulus guttatus* plants experience herbivory, their offspring increase  
79 production of defensive leaf trichomes (Holeski 2007; Colicchio et al. 2015; Colicchio 2017).  
80 Similarly, when the aquatic crustacean *Daphnia cucullata* senses predator cues, it produces offspring  
81 with a defensive ‘helmet’ that protects against predation by midge larvae and cladocerans (Agrawal et  
82 al. 1999). Such inherited environmental effects can be transmitted from parent to offspring (and to  
83 additional generations in some cases) by diverse mechanisms, including heritable epigenetic  
84 modifications (i.e., DNA methylation marks, histone modifications, and small RNAs) and the  
85 allocation of nutritive resources, hormones, mRNAs, and regulatory proteins to seeds or eggs (these  
86 mechanisms are not mutually exclusive; (Herman and Sultan 2011; Jablonka 2013). As more research  
87 has focused on transgenerational plasticity, it has become clear that these effects are highly variable  
88 (Herman and Sultan 2016; Colicchio 2017; Groot et al. 2017) and nearly absent in some cases  
89 (Ganguly et al. 2017). Empirical investigations in diverse plant and animal systems have confirmed  
90 that transgenerational environmental effects can be adaptive when parent and progeny environments  
91 match (i.e., under positive intergenerational environmental autocorrelations; see e.g., Bilichak et al.  
92 2012; Herman et al. 2012; Rasmann et al. 2012; Slaughter et al. 2012; Verhoeven and van Gurp 2012;  
93 Dantzer et al. 2013; Lopez Sanchez et al. 2016; Walsh et al. 2016; Wibowo et al. 2016). Further, Dey

94 et al. (2016), Graham et al (2014), and Sikkink et al. (2014) have demonstrated transgenerational  
95 plasticity can evolve in experimental settings.

96 These results motivated evolutionary research probing the theoretical scenarios in which  
97 transgenerational plasticity is expected to evolve adaptively. A central insight is that natural selection  
98 should favor specific forms of plasticity depending on the precise patterns of environmental variation  
99 experienced by a population (Shea et al. 2011; Sultan and Spencer 2002). Existing theory on the  
100 evolution of both within-generation (Tufto 2015; reviewed by Scheiner 1993; Schlichting and  
101 Pigliucci 1998) and transgenerational plasticity (Lachmann and Jablonka 1996; Räsänen and Kruuk  
102 2007; Kuijper et al. 2014; Prizak et al. 2014; Leimar and McNamara 2015) has demonstrated that  
103 plasticity can evolve when environmental conditions are correlated across time, there is little to no  
104 cost of responding to environmental cues, and there is genetic variation in reaction norm slope.

105 Transgenerational plasticity in particular is likely to evolve when parental and offspring  
106 conditions are either positively or negatively correlated (Proulx and Teotonio 2017), with the  
107 magnitude of the correlation being the primary factor determining the optimal level of  
108 transgenerational plasticity. Recent models have shed light into the evolution of transgenerational  
109 plasticity in patchy environments (Leimar and McNamara 2015), explicitly testing the conditions that  
110 favor deterministic vs. randomizing maternal effects (Proulx and Teotonio 2017), how migration and  
111 population structure impact the evolution of transgenerational plasticity (Greenspoon and Spencer  
112 2018), the optimal levels of epigenetic resetting between generations (Uller, English, and Pen 2015),  
113 and the interaction between the evolution of within-generation and transgenerational phenotypic  
114 plasticity (Kuijper and Hoyle 2015). Additionally, other groups have developed systems comparing  
115 invasion probabilities of lines with various epigenetic modifier loci (Furrow and Feldman 2014) and  
116 applied information theory (Donaldson-Matasci, Bergstrom, and Lachmann 2013) to the evolution of  
117 transgenerational phenotypic plasticity.

118 As formally shown through a variety of models, when environmental autocorrelations  
119 increase, the optimal degree of transgenerational response also increases (e.g., McNamara et al. 2016).  
120 In other words, for transgenerational plasticity to be adaptive, the environment must not only be  
121 variable but also predictable (Burgess and Marshall, *Oikos*, 2014) from one generation to the next.  
122 The scale of environmental variation can also be described in terms of environmental grain (Gillespie  
123 1974), where the relative “coarseness” describes whether the environment fluctuates rapidly or slowly  
124 between states. When the environmental grain is too coarse, genetic adaptation is expected to

125 predominate over forms of plasticity (Banta et al. 2007). When the coarseness is too fine-grained,  
126 transgenerational plasticity is not expected to evolve because the environmental information sensed  
127 by the parent is out of date when progeny receive it (McNamara et al. 2016). In the case of organisms  
128 with relatively fixed generation times, the autocorrelation between parental environmental cues and  
129 offspring selective environments provides a simple quantification of the levels of transgenerational  
130 plasticity that should maximize the mutual information between phenotype and environment. A  
131 common theme across all of the theoretical literature is that these autocorrelations are likely the most  
132 important factor in the adaptive evolution of transgenerational plasticity (Burgess and Marshall,  
133 2014). This consensus motivated us to assess the presence of autocorrelations across this scale of  
134 environmental grain.

135         Despite this surge of experimental evidence, molecular understanding, and theoretical  
136 interest, no study to date has examined long-term environmental data for the presence of such  
137 environmental autocorrelations. Although evolutionary research has traditionally focused on how  
138 the average environmental conditions differ across a landscape, there is no reason to expect that the  
139 scale and predictability of environmental variation is any less complex or ubiquitous than variation in  
140 mean environmental conditions. As prior modelling studies have demonstrated (Uller et al. 2015), the  
141 *spatial variation* in the *temporal predictability* of environmental variation is expected to drive the evolution  
142 of transgenerational effects across a heterogeneous landscape.

143         In this study, we test if empirical patterns of climatic variation allow for the evolution of  
144 within-generation plasticity, transgenerational plasticity, and multigenerational epigenetic inheritance  
145 across different local climate regimes. We use 120 years of fine-scale (4km<sup>2</sup>) climate data spanning  
146 the coterminous U.S. to test for auto- and cross-correlations in temperature and precipitation levels  
147 across years. We found many significant correlations that vary widely in both magnitude and  
148 direction across the US. We then constructed separate models, with summer annual plants in mind,  
149 for temperature and precipitation to determine the degree of transgenerational plasticity that would  
150 maximize fitness in each of these sites across the U.S. Furthermore, by running each model using raw  
151 environmental data and the residuals after removing the effects of directional climate change, we  
152 were able to inspect how climate change alters the benefits associated with transgenerational  
153 plasticity. These results allow us to detect where transgenerational plasticity is expected to evolve  
154 given patterns of environmental variation over the past 120 years.

155 In our precipitation model, we examine transgenerational effects that persist for up to three  
156 generations (Figure 1a), as multiple experimental studies have found that environmentally induced  
157 epigenetic and phenotypic effects can persist for at least this long (e.g., Whittle et al. 2009; Akkerman  
158 et al. 2016), and in some cases for far longer (Vastenhouw et al. 2006; Rechavi et al. 2011). While we  
159 do not consider specific mechanisms of transgenerational plasticity, prior work has demonstrated  
160 that the offspring of plants exposed to drought stress have higher survival in drought conditions,  
161 partially mediated through enhanced root growth phenotypically and altered DNA methylation  
162 patterns at the molecular level (Herman and Sultan 2016). In our temperature model (Figure 1b), we  
163 also determine the degree of within-generation plasticity that would maximize fitness, in response to  
164 both early and late-season temperatures. In plants, transgenerational effects of temperature have  
165 primarily been demonstrated to shift phenology such as flowering time (Case et al. 1996) and  
166 dormancy (Chen et al. 2014), but other phenotypes such as rosette diameter in *Arabidopsis* are also  
167 impacted by parent temperature (Groot et al. 2017). In animals, egg size, survival, developmental  
168 rate, melanisation, and heat-shock survival were all shown to be impacted by parent temperature (*see*  
169 *review*: Donnelson et al. 2017). DNA methylation likely contributes to transgenerational effects of  
170 temperature, and small RNAs also appear to be a major contributor (Houri-Zeevi and Rechavi 2017).

171 Our optimality models extend previous models (e.g., Kuijper and Hoyle 2015; Leimar and  
172 McNamara 2015), by considering multiple different seasonal timepoints in the parental and offspring  
173 generations in which deterministic transgenerational effects can be induced and alter phenotypes. We  
174 also quantitatively simplify prior methods to allow these multiple parameters to be considered across  
175 hundreds of thousands of locations. We compare geometric mean fitness across the 120 years of  
176 climatic data for individuals that utilize different classes of parental information to different degrees.  
177 This approach is similar to how Proulx and Teotonio (2017) used geometric mean fitness to compare  
178 invasion success in individuals exhibiting a variety of different maternal effect strategies. Rather than  
179 assigning a formal genomic framework to our data, we consider a theoretical scenario in which there  
180 is no sexual reproduction, or gene transfer of any kind, and where alleles altering transgenerational  
181 plasticity can vary in magnitude and direction. By distilling down our models to identify the optimal  
182 values of transgenerational plasticity at a given site, we recapitulate the finding from more dynamic  
183 models that plasticity is tied directly to environmental autocorrelations and are able to apply these  
184 theoretical findings to real world climate data. These results suggest that climatic factors could be  
185 sufficient to select for locally adaptive variation in transgenerational plasticity across the landscape.

186 Finally, biologists can use these findings to design experiments by identifying areas of the U.S. where  
187 transgenerational effects are more apt to evolve.

188

## 189 **Methods**

### 190 *Descriptive statistics*

191 Mean monthly temperature and precipitation at a 4km resolution from 1895-2014 (LT81m) were  
192 downloaded from the PRISM climate group web server (PRISM Climate Group, 2004). In short,  
193 PRISM uses climate averages from between 1981-2010 as a predictor grid, and then utilizes station  
194 networks with at least 20 years of data to model monthly temperature and precipitation across the  
195 US. The emphasis on this dataset is long-term consistency making it ideal for our purposes.  
196 Individual yearly values were concatenated using the QGIS merge raster function (Quantum GIS  
197 geographic information system 2012) to create a single data frame, and exported in the .RData  
198 format for downstream analysis. For precipitation data, October was chosen to represent the start of  
199 the “hydrologic” year in order to more accurately capture water availability patterns during the  
200 growing season. For temperature data, mean daily maximum temperature was calculated for March-  
201 May as a measure of early growing season temperature for a given year, and July-September mean  
202 daily maximum temperature for late growing season temperature. Autocorrelations were calculated at  
203 lags between 1 and 12 years (i.e., environmental correlations were calculated between year X and year  
204 X+1, year X and year X+2...year X and year X+12).

205

### 206 *General modeling framework*

207 Mathematical models were constructed in R for both precipitation and temperature patterns  
208 to compare how individuals that use within-generation plasticity, transgenerational plasticity, and  
209 genetic inheritance to varying degrees differ in their capacity to match their phenotype with the  
210 environmentally optimal phenotype for a given year. In these models, there are hundreds  
211 (precipitation models) or thousands (temperature models) of competing genotypes, each representing  
212 unique points of parameter space for alleles that modify the extent to which environment affects  
213 phenotype. Trait value is a measure of the expected environment (temperature or precipitation) and  
214 is determined by a combination of the mean environment at a given site over all years, and terms that  
215 modify this value based on recent environmental information. Each genotype is in essence a  
216 climatologist, that utilizes genetic information (based on mean precipitation over the 120 years at a

217 site), transgenerational plasticity, or within generation plasticity (only in temperature model) to come  
218 up with an expected environment that it will face. This expected environmental value is equivalent  
219 to a phenotype, and the closer this phenotype is to the actual environment experienced, the higher  
220 the fitness that genotype will have for a given generation.

221 While this framework is identical for precipitation and temperature modeling, inherent  
222 differences in precipitation and temperature variables lead to us considering a different set of  
223 parameters for each variable, allowing us to ask related but unique questions regarding  
224 transgenerational inheritance. Precipitation can accumulate as snowpack, bodies of water, or soil  
225 moisture, such that the cumulative precipitation over the course of the water year will determine to a  
226 large extent the amount of water available to a plant. On the other hand, the effects of temperature  
227 are much more immediate and transient, such that a particularly cold spring will not “keep the plant  
228 cool” over the summer, in the way that a particularly wet spring could provide moisture during a  
229 summer of drought. For this reason, we decided to extend our temperature models to compare  
230 patterns across different segments of the growing season, and different forms of plasticity both  
231 within and between a single generation. For precipitation we only considered annual hydrologic year  
232 precipitation without breaking it down by seasons, but we did consider the possibility of multi-  
233 generation persistence of transgenerational plasticity.

234 For each locale, mean annual precipitation (or temperature) across the 120 years ( $P$ ) is  
235 calculated, and this statistic is used as the baseline phenotype of all genotypes in the raw data variant  
236 of the model (Appendix 1). In the residual variant of this formula, a linear regression was fit over the  
237 time-course, and residuals were used as the climate values for each year, with a baseline phenotype of  
238 0. This baseline phenotype is then be adjusted to varying degrees by the parent environment, such  
239 that different genotypes will weigh the contribution of parent environment to a different extent. For  
240 both the precipitation and temperature model we calculated the phenotypes produced by each of 176  
241 (precipitation) and 3,125 (temperature) genotypes at each site (481,631), for each year (119). Then  
242 by comparing the phenotype produced during a season with the actual environment of that season,  
243 we imposed a linear cost on fitness based on the distance between phenotype and the actual  
244 temperature or precipitation of that year (Appendix 1). We then the calculated geometric mean  
245 fitness of every genotype at each site independently to predict which genotype would have the



246 greatest increase in frequency over the course of the time series, and we considered this the optimal  
247 phenotype for that site.

248 This modeling framework represents a variant of other transgenerational plasticity models  
249 where the direct parent environment alters offspring phenotype. We model the transgenerational  
250 effect as a linear reaction norm with slope  $m$  with respect to the environment experienced at a  
251 particular previous point in time (for the precipitation model this represents the water year  
252 experienced by the past generation, or in the temperature model the temperature experienced in the  
253 current generation's spring, the previous generation's spring, or the previous generation's fall). In the  
254 case of multigenerational effects, our  $g$  terms linearly reduce the norm of reaction slope of the  
255 grandparental and great-grandparental generation relative to the effects of the parental generation  
256 (Appendix 1). This approach is similar to the analytical models designed by Uller, English, and Pen  
257 (2015) where maternal effects were modeled as a "linear reaction norm with respect to the mother's  
258 *perceived* environment" where the perceived environment was the environmental state of the previous  
259 generation with an additional normally distributed error term. Leimar and McNamara (2015) utilize a  
260 more complex model where adult phenotype is modeled as a logistic function wherein the  $a_{ma}$  term  
261 determines the weighting of maternal environmental cue, as well as two terms ( $m_{mat}$  and  $d_{mat}$ ) that  
262 control the weighting of maternal phenotype transgenerational plasticity and direct parent  
263 environment transgenerational plasticity. Proulx and Teotonio (2017) consider six different classes of  
264 inheritance strategies competing in environments that switch between two states with variable  
265 frequencies. In their modeling framework the strategies aDME and mDME correspond to two-state  
266 variants of positive ( $m > 0$ ) and negative ( $m < 0$ ) transgenerational effects, respectively, as modeled  
267 here. Finally, Kuijper and Hoyle (2015) model maternal effects as a linear transgenerational reaction  
268 norm but on parental phenotype rather than parental environment. In our models, we consider  
269 fitness to decrease linearly as an individual's phenotype moves further from the phenotypic optimum  
270 at a point in time. We compare the geometric mean fitness of individuals expressing different  
271 strategies over the 120 years to find the strategy most likely to invade. Similar to most previous  
272 models (Uller, English, and Pen 2015; Proulx and Teotonio 2017; Lachmann and Jablonka 1996; but  
273 see Leimar and McNamara 2015; Greenspoon and Spencer 2018), we base our model on haploid  
274 asexually reproducing individuals. Our temperature model extends previous work by explicitly  
275 breaking down both the life cycle of the parent and offspring generations between early and late

276 growing season, allowing for five different temporal classes of plasticity (four types of  
277 transgenerational plasticity, and within-generation plasticity).

278

## 279 **Results**

280 Both mean annual precipitation and growing season temperatures vary immensely across the  
281 US (Figure 2 and S1), but for the evolution of locally adaptive phenotypic plasticity, it is the patterns  
282 of variation that are more relevant. The standard deviation of a site's annual precipitation and  
283 growing season temperatures over the past 120 years also varied dramatically (Table 1 and S1), with  
284 precipitation inter-annual standard deviation (IASD) varying from 40mm to 800mm, spring  
285 temperature IASD from 0.77C to 1.95C, and summer temperature IASD from 0.35C to 1.32C  
286 (Figure 2 and S1 and Table S1). The southwest US generally had the highest precipitation IASD  
287 relative to its mean precipitation, with IASD being nearly equal to the mean precipitation in some  
288 regions (Figure 2).

289 Directional climate change over the past 120 years was prevalent and variable across the US  
290 (Figure 2). Mean annual precipitation has declined over much of the Sierra Nevada mountain range,  
291 southern California, and other scattered regions over the last 120 years, while precipitation levels  
292 have increased in the Midwestern and much of the northeastern US. Both spring and summer  
293 temperatures have risen substantially with the exception of the southeast, where spring temperatures  
294 have decreased and summer temperatures have changed little (Figure 2). This phenomenon has been  
295 noted numerous times (Knappenberger et al. 2001; Ellenburg et al. 2016) and seems to be largely due  
296 to a switch from cropland to natural forest ecosystems across the southeastern US during the past  
297 120 years that has led to greater transpiration cooling.

298 Although a variable environment is necessary for the evolution of adaptive phenotypic  
299 plasticity, it is the patterns and predictability of this variation that influence which forms of plasticity  
300 will be favored. In particular, when the grain of environmental variation is such that autocorrelations  
301 between the parental environmental cue and the offspring environment at the time of selection,  
302 mutual information will be maximized by transgenerational plasticity. We calculated autocorrelations  
303 in annual temperature and precipitation levels between successive years, which allowed us to sum  
304 across the frequencies of environmental fluctuations to capture the scale of environmental grain  
305 expected to favor transgenerational plasticity in annual species. We found that the magnitude and

306 directions of autocorrelations on this timescale were highly variable across the US (Figure 2 and S1,  
307 Table 1 and S1).

308 Averaged across all sites, the precipitation autocorrelation (AC) at lag-1 (i.e., the correlation  
309 between the precipitation one year and the next) was slightly positive (mean=0.04, Table 1, Figure  
310 S1), and was reduced by half after taking linear changes in precipitation into account (mean=0.02,  
311 Table 1, Figure S1). Spatially, we found that the southeastern gulf coast was the largest region with  
312 negative lag-1 ACF (dry years tend to be followed by wet years), while the northeastern US was the  
313 largest region of substantially positive lag-1 ACF (Figure 2). Somewhat surprisingly, there were many  
314 more sites with moderately positive (62,693: lag-2 PACF > 0.2, vs. 21,671: lag-1 ACF >0.2) and  
315 negative (5,088 lag-2 PACF <-0.2 vs. 441 lag-1 ACF <-0.2) lag-2 partial autocorrelation (PAC) than  
316 lag-1 ACF. This suggest that climatic oscillations impacting annual precipitation tend to operate over  
317 more than two years in these regions, and that on a year to year basis, variation is more stochastic  
318 (leading to lower absolute lag-1 ACF).

319 Patterns of temperature autocorrelations extended over larger regions and were more  
320 extreme than the patterns observed for precipitation autocorrelations (Figure 2). Lag-1 ACF for  
321 spring and summer temperatures varied a great deal, with patterns of summer temperature  
322 autocorrelation substantially more positive than those of spring (summer ACF-1 mean: 0.24, spring  
323 mean: -0.01, Figure S1). In both cases, however, the western US tended to have more positive  
324 autocorrelations than the rest of the country (with the exception of southern Florida; Figure 2). The  
325 mean lag-2 PACF for spring temperature was negative (mean: -0.04, Figure 3) and more variable than  
326 lag-1 ACF (sd=0.1 vs. 0.08), with much of the north-central US displaying lag-2 PACF of less than -  
327 0.2 (Figure 2). The mean lag-2 PACF for summer temperatures was positive (mean: 0.09), but  
328 substantially lower than the mean lag-1 ACF (mean: 0.24).

329 Modelling work on transgenerational plasticity has often focused on positive lag-1  
330 autocorrelations and found them to be highly correlated with optimal transgenerational plasticity. In  
331 the particular case of anticipatory transgenerational effects, the autocorrelation between the  
332 environment the parent experiences and the offspring selective environment was found to be almost  
333 perfectly tied to the evolved mean maternal effects after 50,000 simulated generations (Kuiper et al.,  
334 2014), with similar results in a number of other studies (Tufto 2015; English et al. 2015; McNamara  
335 et al 2016). Partial-autocorrelations at lag-2 represent the additional mutual information captured by  
336 the grandparental environment, and are therefore is expected to influence the evolution of

337 transgenerational effects that are transmitted over two generations. From these prior modeling  
338 results it is reasonable to expect that locations with high positive autocorrelations may be favorable  
339 for the evolution of transgenerational plasticity. Within these sites, areas with high lag-2 partial  
340 autocorrelations may favor the transmission of environmental information across two generations.

341

## 342 **Modeling Results**

### 343 *Optimal levels of transgenerational plasticity: precipitation*

344 As expected, the dramatic variability of precipitation autocorrelations across the US leads to a  
345 great deal of variation in the optimal levels of plasticity in our evolutionary models (Figure 3, Table  
346 S1). In the raw variant of the model, optimal parental effect values were positive in 314,118 cases  
347 (65%), zero in 32,352 (7%), and negative in 135,161 (28%), compared to 55%, 7%, and 38%  
348 respectively in the residual variant. The most common “parental effect” value ( $m$ , see Appendix 1)  
349 in the precipitation model was 0.1 (22.5% and 21.8% of sites in the raw and residual models,  
350 respectively, Figure 3a). This level of parental effect indicates that 90% of phenotypic variance is  
351 dictated by the long-term average (genetic effects), and 10% by the difference between the parental  
352 environment and the long-term average environment. The second most common optimal value of  $m$   
353 was 0.2 (19.15% in the raw model, 18.6% in residual model), followed by -0.1 (14.3% in the raw  
354 model, 17.2% in the residual, Figure 3a).

355 The multigenerational persistence ( $g$ , Appendix 1) of transgenerational effects was also  
356 found to vary greatly across the US with the two most common values being 1 (40.7% raw, 39.5%  
357 residual) and 0 (18.6% raw, 16.8% residual) (Figure 3b). Here, a value of 1 indicates that the  
358 precipitation one, two, and three years prior all contribute equally to the expected precipitation at a  
359 given site. A  $g$  value of 0 indicates that only the previous year’s precipitation is predictive of the  
360 current precipitation level. The remaining 40.7% of sites (in the raw variant) have intermediate  
361 optimal values of  $g$ , suggesting that in these locations the precipitation of each of the past three years  
362 is informative, but information from the immediately preceding year is of the highest value (Figure  
363 4). Interestingly, full multigenerational persistence ( $g = 1$ ) was more frequently optimal at sites with  
364 negative transgenerational effect values compared to those with positive values (44.9% vs. 38.9%,  
365 respectively), where intermediate multigenerational persistence was more common (Figure S2).

366 Spatial variation for optimal precipitation plasticity values largely paralleled the spatial  
367 distribution of inter-annual precipitation autocorrelation patterns (compare Figure 2a to Figure 4a).  
368 This agrees with previous modeling results that have linked autocorrelation levels with the optimal  
369 levels of transgenerational plasticity (McNamara et al., 2016). At the broadest level, the northern  
370 latitudes show the highest optimal transgenerational precipitation plasticity values (Figure 4a), but not  
371 necessarily multi-generation persistence of transgenerational effects (Figure 4b). Optimal  
372 transgenerational plasticity values were on average 0.057 lower in the residual variant of the model  
373 compared to the raw variant, with the vast majority of sites having equal values (56%), decreasing by  
374 0.1 (24%), decreasing by 0.2 (8.5%), or increasing by 0.1 (4.3%). The northeastern US and the  
375 Yellowstone National Park region, where precipitation increased most (Figure 2), also saw the  
376 greatest proportion of their optimal transgenerational plasticity values diminished after factoring out  
377 linear climate change (Figure 4c). Therefore, although transgenerational plasticity has been optimal  
378 over the past 120 years in these regions, these benefits appear to be contingent upon recent warming  
379 trends.

380

### 381 *Optimal levels of transgenerational plasticity: Temperature*

382 Purely positive transgenerational effects ( $m_{EE} \geq 0, m_{EL} \geq 0, m_{LL} \geq 0, m_{LE} \geq 0$ ) of  
383 temperature were optimal in 70.2% of sites (338,327 out of 481,631) in the raw version of the model  
384 and 55.7% of sites (268,307) in the residual variant. Conversely, only 1.4% of sites (7,018) in the raw  
385 model and 3.1% (14,777) in the residual version included only negative transgenerational plasticity  
386 values. Only 0.4% (raw model) or 0.9% (residual model) of sites totally lacked transgenerational  
387 plasticity (either positive or negative) as part of the optimal strategy. The optimal strategies in the  
388 remaining sites (28% raw model, 40% residual model) comprised a mixture of positive and negative  
389 transgenerational plasticity values. Positive within-generation plasticity was favored in 79.7% of sites  
390 (383,667), compared to only 0.03% of sites (157) in which negative within-generation plasticity ( $w$ ,  
391 Appendix 1) was favored, and 20.3% of sites (97,807) in which no within-generation plasticity was  
392 favored (Figure 3g). Optimal levels of within-generation plasticity were generally positive and minor  
393 across the US; 72% (346,603/481,631) of sites had an optimal  $w$  value of 0.1 (Table S1).

394 The most common optimal form of transgenerational plasticity to temperature in both the  
395 raw and residual models was the effect of late growing season temperature on the next generation's

396 late growing season phenotype ( $m_{LL}$ , Figure 3f, Table 2a). Effects of late season temperature on the  
397 next generation's early season phenotype ( $m_{LE}$ ) were the most variable, with a substantial number of  
398 sites having negative transgenerational plasticity values (63,881 raw, 100,267 residual) and many  
399 others having moderate (98,524 raw, 66,625 residual) and major (26,967 raw, 10,080 residual) positive  
400 values (Figure 3e). When considering the combined plasticity value profile of a site, the most  
401 common combination of plasticity values is, EE: none (0), EL: minor (0.1), LE: minor (0.1), LL:  
402 moderate (0.3), WP: minor (0.1) (Table 2b). Summing the four transgenerational plasticity alleles  
403 together we find the southwest US has the highest optimal values of transgenerational plasticity,  
404 while the Great Lakes region has the lowest optimal values (Figure 4d). In the southwestern US,  
405 where temperature increased the most over the past 120 years (Figure 2), the difference between the  
406 raw and residual model was the greatest (Figure 4g).

407         Variation in different classes of temperature autocorrelations between seasons explains a  
408 large portion of the variation in the optimal transgenerational response to temperature at a given site.  
409 For example, the autocorrelation between early season growing temperature and the next year's late  
410 season growing temperature is the factor that explains the largest amount of variation in optimal  
411 levels of  $m_{EL}$  (Table 3). We assessed potential tradeoffs between different forms of transgenerational  
412 plasticity to temperature by first calculating the residuals of a particular plasticity term after  
413 accounting for the effects of environmental autocorrelations, then testing the effect of the other four  
414 plasticity terms on these residuals. There was a highly significant negative association between  $m_{LE}$   
415 and  $m_{EE}$  plasticity, and between  $m_{LL}$  and  $m_{EL}$  plasticity (Figure S3a). As higher levels of LL  
416 transgenerational plasticity were favored, the optimal levels of EL plasticity also decreased across all  
417 environmental autocorrelation values. These associations suggest that, for a given life history stage in  
418 this model, there are tradeoffs between using transgenerational information from the previous  
419 generation's early vs. late season temperature (Table S2). For example, there are many sites where no  
420 plasticity,  $m_{EE}$  plasticity, and  $m_{LE}$  plasticity all have higher fitness than individuals exhibiting both  
421  $m_{EE}$  and  $m_{LE}$  plasticity (Figure S3b).

422

### 423 *Fitness Landscapes*

424         In the previous analyses we used restricted parameter space to identify optimal site-specific  
425 combinations of plasticity values across the entire contiguous U.S., but further insight can be gained

426 by comparing fitness landscapes across the full parameter space at individual sites. As both the  
427 magnitude of transgenerational plasticity and the persistence of these effects through time have been  
428 found to vary, these two parameters represent two biologically realistic components of  
429 transgenerational plasticity variation. Using the precipitation model we found that, among sites where  
430 fitness optima are located near zero transgenerational effects, a vertical fitness ridge formed that was  
431 centered near parental effect values of zero. This result is due to transgenerational persistence levels  
432 (y-axis) having a minimal impact on phenotype when parental effects are marginal. As absolute  
433 optimal parental effect values increased, however, the fitness landscape shifted from a ridge to a  
434 peak, with certain values of transgenerational persistence imparting extreme fitness advantages over  
435 others (Figure 5). Site B (North Central Minnesota) exemplifies a unique and unexpected outcome of  
436 this model: under certain conditions, there can be multiple local fitness maxima with divergent levels  
437 of transgenerational plasticity (Figure 5). Two fitness maxima exist at this site, one in which the  
438 optimal strategy comprises slightly negative parental effect values with no multigenerational  
439 persistence, and a second in which the optimal strategy comprises slightly to moderately positive  
440 parental effect values with high levels of multigenerational persistence. This situation occurs when  
441 two conditions hold: the lag-1 autocorrelation is in a different direction than the average of the lag-2  
442 and lag-3 autocorrelations, and the absolute value of the lag-1 autocorrelation is less than the average  
443 of the lag-2 and lag-3 autocorrelations. This scenario occurs in approximately 90k out of the 480k  
444 sites, but only in 30k sites are lag-2 and lag-3 average values greater than 0.1 and therefore likely to  
445 show up as bimodal peaks in our model.

446

## 447 **Discussion**

448 Although transgenerational environmental effects on phenotypic expression have been  
449 recognized for decades (Falconer 1981; Roach and Wulff 1987), interest in these effects has surged  
450 recently due to increased appreciation for the potential role of transgenerational plasticity in  
451 adaptation (Donelson et al. 2018). Despite this renewed interest, a critical question has remained  
452 unanswered: do natural patterns of environmental variation contain fluctuations of intermediate  
453 environmental grain that favor the evolution of adaptive transgenerational plasticity? Our analysis of  
454 120 years of climatic data from the continental U.S. revealed that such patterns are indeed  
455 widespread. Specifically, we analyzed how inter-annual variation in precipitation and temperature  
456 impacts the optimal mode of adaptation for clonally reproducing organisms with a life cycle meant to

457 mimic that of an annual plant. When there are correlations between the parental and offspring  
458 environments, neither traditional genetic selection nor within-generation plasticity take full advantage  
459 of the available information inherent in the environment. Instead, under such correlations selection  
460 should favor the genetic evolution of mechanisms that transmit plastic responses from one  
461 generation to the next. Absent such correlations, the information provided by the parental  
462 environment may not be relevant to offspring, and indeed may prove to be maladaptive (reviewed by  
463 Herman et al. 2014).

464 Our modeling results revealed that the vast majority of sites in the contiguous US  
465 experienced autocorrelations in precipitation and temperature that should favor the evolution of  
466 adaptive transgenerational plasticity. As predicted by other models, the predictability of an  
467 environmental variable as measured by its autocorrelation is a major factor driving the optimal level  
468 of plasticity (e.g., Groot et al. 2017; English et al. 2015; Sultan and Spencer 2002; Scheiner 2016).  
469 Furthermore, we find that the strength and direction of autocorrelations in precipitation and  
470 temperature varied substantially across the U.S., and consequently, the optimal levels of plasticity  
471 were also highly variable. These results provide novel insight into where transgenerational effects are  
472 likely to evolve.

473 The environmental autocorrelation between successive generations reduces the spectra of  
474 environmental oscillations, or the grain of environmental variation, to a metric that is highly relevant  
475 to transgenerational plasticity. While the precise relationship between the level of autocorrelation and  
476 the optimal degree of transgenerational plasticity can vary depending on the precise modeling  
477 conditions, autocorrelations between parental environments and offspring selective environments are  
478 consistently associated with environments that select for transgenerational plasticity. A recent  
479 synthesis of transgenerational plasticity studies highlighted the importance of considering  
480 environmental predictability when designing experiments that test for the presence of adaptive  
481 transgenerational plasticity (Yin et al. 2019). Indeed, some experiments that failed to find evidence of  
482 adaptive transgenerational plasticity were in systems where models would not expect such effects to  
483 evolve. Our results provide a starting point for biologists looking to design experiments on natural  
484 variation in transgenerational plasticity.

485

486 *Precipitation*



487           Local adaptation to variable water regimes has been a major focus of plant evolutionary  
488 ecology for many years. This literature shows that plants have evolved a wide range of physiological,  
489 phenological, and morphological adaptations to handle site-specific patterns of water availability  
490 (Kooyers 2015). These adaptive phenotypes may be expressed constitutively or may be induced by an  
491 environmental cue that predicts a change in water availability later in the life of the organism.  
492 Increasingly, experimental studies show that the parental soil moisture regime can also adaptively  
493 influence the development of progeny (e.g., Alsdurf et al. 2013; Alsdurf et al. 2015), providing a third  
494 route by which plants can fine tune the phenotypes of their offspring to local soil-moisture levels.  
495 For instance, in Massachusetts genotypes of the annual plant *Polygonum persicaria*, offspring of  
496 drought-stressed parents make more extensive root systems and deploy them faster in response to  
497 drought as compared to offspring of well-watered parents. This drought-induced change in growth  
498 and development can be inherited for at least two generations, resulting in increased survival of  
499 grand-offspring under severe drought stress (Sultan et al 2009; Herman et al. 2012). Furthermore,  
500 these epigenetic effects of drought are genetically variable in *P. persicaria*: some genotypes strongly  
501 increase root length and biomass in response to parental drought, while other genotypes do so only  
502 moderately or not at all (Herman and Sultan 2016).

503           Our analysis revealed substantial and spatially variable interannual autocorrelations in  
504 precipitation, indicating that precipitation levels in one year are often predictive of precipitation levels  
505 up to three years later. For example, across the coterminous U.S., lag-1 interannual precipitation  
506 autocorrelations varied from moderately negative (-0.27) to strongly positive (0.69), including some  
507 values near zero. In turn, the optimal direction and strength of transgenerational effects of  
508 precipitation also varied. Positive parental effects, wherein individuals are developmentally  
509 predisposed to perform better in environments that match their parents' environment, were optimal  
510 across more than twice as many regions (65% of sites) as negative transgenerational effects (28% of  
511 sites), wherein individuals perform better in a different environment than their parents. Relatively  
512 strong parental effect values of 0.3 or higher were optimal in nearly 30% of sites. By contrast,  
513 complete absence of parental effects was favored in only 7% of sites.

514           Multigenerational persistence values of 0 (18.7% of sites) and 1 (40.7% of sites) were most  
515 common, representing strategies in which transgenerational effects lasted only a single generation or  
516 persisted fully to the third generation, respectively. The remaining persistence values were somewhat

517 evenly distributed between 0 and 1 and represent strategies in which environmental information gets  
518 passed through three generations, but the environment of recent years is weighted more heavily.

519 The optimal level of transgenerational effects varied on multiple scales. On the largest scale,  
520 we found that the western and northern US experience conditions that select for the highest levels of  
521 transgenerational plasticity (Figure 4a). There was a striking contrast between the northeast, where  
522 positive transgenerational plasticity was generally optimal, and the southeast, where negative  
523 transgenerational plasticity predominated. On these intermediate to large spatial scales, it is likely that  
524 natural selection could counteract the homogenizing force of gene flow to generate patterns of  
525 locally adaptive transgenerational plasticity to precipitation. Experiments designed to compare  
526 transgenerational plasticity to precipitation in individuals derived from these north/south or  
527 east/west clines would provide novel evidence for climatic patterns shaping the system of inheritance  
528 in individuals. There was also considerable variation in optimal levels of transgenerational plasticity  
529 on much finer scales. In some cases, levels of transgenerational plasticity were highly divergent  
530 between adjacent sites (e.g., in Texas and Minnesota). In these cases, and particularly for outcrossing  
531 species, it is less likely that natural selection would be able to counteract gene flow, perhaps limiting  
532 the locally adaptive evolution of transgenerational plasticity.

533

#### 534 *Temperature*

535 Temperature is vitally important to plant function and fitness, as it impacts the rate of  
536 physiological reactions, cues developmental transitions, and in extremes can cause stress and  
537 mortality. Plants adapt to variable temperature regimes in a host of ways, including the production of  
538 heat shock proteins and cold-response factors, and the development of morphologies that mitigate  
539 the experience of temperature extremes. Experimental studies have identified adaptive plastic  
540 responses to temperature changes, both within and across generations. For example, ambient  
541 temperature in *Arabidopsis thaliana* has been shown to influence the expression and splicing of  
542 hundreds of genes, leading to changes in histone methylation (Pajoro et al. 2017), and shifts in  
543 flowering time (Donohue 2009) and other phenotypes (Adams et al. 2016) in genotype-specific ways.  
544 Additionally, recent work has demonstrated that effects of temperature on *A. thaliana* plants persist  
545 for multiple generations (Whittle et al. 2009; Suter and Widmer 2013a; Suter and Widmer 2013b;  
546 Groot et al. 2017). In order for these responses to adaptively match phenotypes with environments,  
547 there must be substantial correlations in temperature within and between growing seasons.

548 We found significant autocorrelations in temperature, both within and between years. Within  
549 a single growing season, temperatures early and late in the growing season tended to be positively  
550 correlated across the U.S. Furthermore, we found that the temperatures of the late growing season  
551 months (July, August, September) were generally strongly autocorrelated between successive years.  
552 Interannual correlations between the temperatures of the early growing season months (February,  
553 March, April) were often much lower. As expected, we find that, at a given site, the strength of the  
554 correlation between the average temperature during the season in which information is gathered and  
555 the average temperature during the season when selection occurs is highly predictive of both the type  
556 and degree of plasticity that will be favored. For example, warmer than average springs were very  
557 often followed by hotter than average summers, and this information yielded benefits via within-  
558 generation responses to temperature in many sites. The optimal strategy in more than 99% of sites  
559 across the U.S. contained some form of transgenerational plasticity, suggesting that environmental  
560 oscillations provide valuable information that allows transgenerational plasticity to improve the  
561 match between phenotypes and temperature regimes.

562 The most common form of transgenerational plasticity in this model was late-growing season  
563 temperature impacting the following generation's phenotype late in the growing season, which  
564 matches our expectations based on the patterns of temperature autocorrelation. Interestingly,  
565 patterns of environmental oscillations lead to favorable strategies in which the current late-season  
566 phenotype was more strongly impacted by the previous late-season temperature than it was by the  
567 current generation early season temperature. Indeed, this pattern was found in over half of the  
568 regions considered (270k/480k). Although intuition suggests that more recent information is of  
569 higher value, this result suggests that parental environments can be more predictive of offspring  
570 selective environments than environmental cues early in the offspring generation. This result stems  
571 from the cyclic nature of seasonal environments (Auge et al. 2017). Since autocorrelations between  
572 consecutive early growing seasons were generally low, it is not surprising that effects of early growing  
573 season temperatures on phenotypes in the following early growing season was the least common  
574 form of plasticity and was in the negative direction more often than the positive. Other forms of  
575 transgenerational plasticity were present at intermediate levels and varied across the US.

576 The west coast of the US and southern Florida experienced the highest optimal  
577 transgenerational plasticity values. Because these regions are due east of large bodies of water, their  
578 climates are heavily influenced by maritime airflow including the prevailing westerlies, loop current,

579 and Coriolis affect (Lorentz 1966). As water has a substantially higher heat capacity than either rock  
580 or soil, the location of these land masses downstream of maritime air may predispose them to  
581 temperature autocorrelations between years, but whether this result is universal will take studies on  
582 other continents. These areas may be primed for large-scale, community level comparisons of  
583 transgenerational plasticity. Comparisons of transgenerational plasticity in individuals found on the  
584 west vs. east coast could shed light on the generality of these patterns across a diversity of annual  
585 plants and other taxa.

586 We found highly variable associations between late growing season temperature and the  
587 following generation's early growing season temperature. This result is intriguing because the  
588 temperature experienced during seed maturation strongly influences the dormancy and germination  
589 behavior of seeds, with cascading effects throughout the life cycles of annual plants (Donohue 2009;  
590 Burghardt et al. 2016). Consequently, site-specific correlations between maternal late-season  
591 temperature and the early-season temperature in the next generation may select for divergent, site-  
592 specific effects of maternal temperature on germination. Intriguingly, parental effects of temperature  
593 on germination and flowering time are highly genetically variable in *A. thaliana* (Burghardt et al. 2016;  
594 Kerdaffrec and Nordburg 2017; Groot et al. 2017). In *Plantago lanceolata*, such genotype-by-maternal  
595 temperature effects persist throughout the offspring life cycle to generate variation in reproduction in  
596 the field (Lacey and Herr 200). Our results suggest that genetic variation for maternal effects may  
597 derive in part from variable selection imposed by differences among sites in temperature correlations  
598 (see also Groot et al. 2017).

599

## 600 **Common Themes and Future Directions**

601 Although our precipitation and temperature models yielded distinct insights into the  
602 dynamics of each of these factors, common themes emerged in both sets of analyses. For example,  
603 we found higher levels of inter-annual autocorrelation, and therefore more prominent  
604 transgenerational effects, at northern latitudes and along coastal regions within both models. Studies  
605 that compare patterns of transgenerational plasticity across such large geographic regions will be  
606 necessary to determine whether underlying differences in environmental patterns do in fact drive  
607 differences in transgenerational plasticity. While the scale of gene flow varies greatly among species,  
608 these large-scale patterns generate large contiguous regions with divergent optimal levels of  
609 transgenerational plasticity that should provide ample opportunity for natural selection to drive the

610 evolution of transgenerational effects even in the face of gene flow. For example, in our temperature  
611 model, the western half of the US represents a contiguous region where positive transgenerational  
612 effects are expected to evolve, while the neighboring great lakes region is many thousands of square  
613 miles in area with negative optimal transgenerational plasticity. These large regional differences  
614 should allow selection to produce divergent transgenerational norms of reaction; future studies  
615 explicitly modeling the migration and evolutionary parameters of specific species will be necessary to  
616 test these predictions in different scenarios.

617 Another common finding of both the temperature and precipitation models is that  
618 transgenerational effects are expected to provide greater benefits in changing climates relative to  
619 purely oscillating climates, in which linear climate change has been removed (i.e., the residual  
620 models). These results suggest that transgenerational effects may have an important role in  
621 adaptation to human-induced climate change, and that rapid climate change should select for more  
622 transgenerationally plastic individuals. However, there is an important caveat. In our models we  
623 assume that genotypes are uniform in their mean phenotype, and do not allow for mutations that  
624 could lead to genetic adaptation to changing conditions. The potential for transgenerational plasticity  
625 to either promote or hinder genetic adaptation has been explored (Day and Bonduriansky 2011), but  
626 our models do not address this issue. In the absence of genetic evolution, it follows that if there is a  
627 linear trend towards hotter or drier years in addition to climatic oscillations (as in the raw model  
628 variants), then there is more transgenerational information relative to a situation in which only  
629 climatic oscillations are occurring (residual model variants). Theory indicates that these dynamics  
630 become much more complex when local genetic adaptation to changing conditions is allowed to  
631 occur along with plastic responses (Groot et al. 2017). For instance, in some scenarios  
632 transgenerational effects can increase fitness in the short term, while reducing it in the long term  
633 (Hoyle and Ezard 2012).

634 Temperature and precipitation autocorrelations likely stem in part from the same broad-scale  
635 climatic oscillations, such as the El Niño Southern Oscillation (Yang et al. 2018), the Quasi-biennial  
636 oscillation (Baldwin et al. 2001), and the Pacific Decadal Oscillation (Mantua and Hare 2002;  
637 Newman et al. 2016). Aside from these climatic oscillations, autocorrelations will arise due simply to  
638 “red” or “pink” noise in which rare, large events and common, small events have equal power in  
639 explaining variation (Szendro et al. 2001). It has been demonstrated that even without clear  
640 underlying phenomena explaining variation, pink-noise is often the model that best explains patterns

641 of ecological and abiotic time-series variation (Halley 1996). These oscillations and general patterns  
642 of red noise will interact with each other to varying degrees across different regions of the US,  
643 leading to variable levels of autocorrelation at all lags for both precipitation and temperature.

644 Furthermore, because temperature and precipitation interact to alter moisture availability, it is  
645 likely that organisms do not process temperature and precipitation information independently, but  
646 rather use them in tandem along with other sources of information to fine tune phenotypes for the  
647 most likely future environment. For instance, temperature influences water availability by influencing  
648 rates of evaporation and transpiration. Interactions between temperature and water availability also  
649 shape the collection of herbivores, pathogens, and competitors present in a given locality.  
650 Understanding how these environmental factors jointly influence the expression of transgenerational  
651 plasticity is an important goal for future research.

652 A key element of this research direction is to study environmental (auto)correlations at fine  
653 scales in the context of dispersal distances. It is possible that transgenerational plasticity may be a  
654 more common mode of adaptation for organisms with short dispersal distances, in which parents  
655 and offspring are more likely to grow and develop in similar microsites. Finally, differences in life  
656 history strategies and generation times will alter the timescales and types of environmental  
657 autocorrelations relevant to transgenerational plasticity.

658 A recent meta-analysis of 1,170 transgenerational plasticity effect sizes found that there was  
659 substantial evidence for adaptive transgenerational plasticity, but that these effects varied according  
660 to the type of trait that was considered, the environmental context, and the taxonomic and life-  
661 history group of the focal organism (Yin et al., 2019). In particular, this meta-analysis found that  
662 annual plants displayed the most substantial evidence for adaptive transgenerational plasticity, and  
663 that physiological traits showed the highest evidence for adaptive plasticity to parent environments.  
664 The finding that annual plants displayed the greatest degree of transgenerational plasticity is  
665 consistent with their limited mobility and short-life cycle, both of which increase the likelihood that  
666 offspring experience similar environments to their parents. The mean effect size found in this study  
667 for annual plants was 0.163 for reproductive traits and 0.216 for physiological traits, which is  
668 consistent with our modeling results. We found that the mean inter-annual summer temperature  
669 autocorrelation was 0.24 and 0.17 before and after factoring out linear effects of climate change, with  
670 optimal transgenerational effect sizes in our temperature model ranging from 0 to 0.3. While Yin et  
671 al. 2019 did not consider differences between environmental variables, inter-annual temperature

672 autocorrelations could drive autocorrelations in a diversity of selective pressures. Taken together with  
673 our modeling results, this meta-analysis indicates that observed strengths of transgenerational effects  
674 in annual plants are in line with the predictions made by patterns of autocorrelations observed in  
675 nature. Similarly, Yin et al. (2019) found that short-lived invertebrates were the second most likely  
676 group to express transgenerational plasticity, suggesting that the capacity to transmit epigenetic  
677 information between generations is not phylogenetically limited. For longer-lived taxa, such inter-  
678 annual autocorrelations would be relatively fine-grained, and thus more likely to select for within-  
679 generation rather than transgenerational plasticity. Future studies modeling the evolution of  
680 transgenerational plasticity in individuals with disparate life histories will be critical for better  
681 understanding the evolution of these environmental effects.

682

683

## 684 **Conclusion**

685 In summary, we demonstrate that patterns of climatic variation in nature may favor the  
686 adaptive evolution of transgenerational plasticity in organisms with approximately annual generation  
687 times, such as annual plants. Our models indicate that differing patterns of climatic oscillations  
688 across the US lead to strikingly different optimal patterns of within- and transgenerational plasticity.  
689 Thus, for a given species, one may expect that environmental variation across its range not only  
690 selects for different locally adapted mean trait values, but also different classes and magnitudes of  
691 plasticity. Perhaps the most meaningful result of this study is that the climatic patterns across  
692 relatively small geographic regions vary so dramatically that the optimal value of transgenerational  
693 plasticity ranges from extremely high to non-existent. It should therefore be expected that although  
694 many species, environmental variables, or phenotypes of interest may show no evidence of  
695 transgenerational plasticity, such results may be due to their specific ecological situation rather than a  
696 fundamental biological limitation. This applies equally strongly to the other side of the coin: because  
697 a single population or species expresses strong transgenerational plasticity does not mean that  
698 transgenerational effects are a universally key driver of evolutionary processes. Rather, variation in  
699 transgenerational plasticity should be expected, just as genetic variation is ubiquitous in natural  
700 populations. Transgenerational plasticity is best considered in the specific ecological and evolutionary  
701 context of the study organism, and broad generalizations about the role of these effects in evolution

702 should be avoided until considerably more field data are in hand. The results described here provide  
703 a source of testable predictions for geographical variation in this mode of adaptation.

704

## 705 Acknowledgments

706 We thank the Blackman and Bergelson lab groups for comments on earlier versions of the  
707 manuscripts. We also thank the UC Berkeley BRC computing core faculty for computing resources  
708 and aid with running simulations.

709

## 710 References

1. Adams, W.W., J.J. Stewart, C.M. Cohu, O. Muller, & B. Demmig-Adams. 2016. Habitat temperature and precipitation of *Arabidopsis thaliana* ecotypes determine the response of foliar vasculature, photosynthesis, and transpiration to growth temperature. *Front. Plant Sci.* 7:1026. doi. 10.3389/fpls.2016.01026.
2. Agrawal, A., C. Laforsch, and R. Tollrian. 1999. Transgenerational induction of defences in animals and plants. *Nature* 401:60-63.
3. Akkerman, K., A. Sattirin, J. K. Kelly, and A. G. Scoville. 2016. Transgenerational plasticity is sex-dependent and persistent in yellow monkeyflower (*Mimulus guttatus*). *Environmental Epigenetics*. doi: 10.1093/eep/dvw003
4. Alsdurf, J. C. Anderson, D.H. Siemens. 2015. Epigenetics of drought-induced trans-generational plasticity: consequences for range limit development. *AoB Plants* 8: plv146. doi: 10.1093/aobpla/plv146.
5. Alsdurf, J. D., T. J. Ripley, S. L. Matzner, and D. H. Siemens. 2013. Drought-induced trans-generational tradeoff between stress tolerance and defence: consequences for range limits? *AoB Plants* 5:plt038.
6. Auge, G. A., L. D. Leverett, B. R. Edwards, and K. Donohue. 2017. Adjusting phenotypes via within- and across-generational plasticity. *New Phytol.* 216:343-349.
7. Baldwin, M.P., L.J. Gray, T.J. Dunkerton, K. Hamilton, P.H. Haynes, W.J. Randel, J.R. Holton, M.J. Alexander, I. Hitora, T. Horinouchi, D.B.A. Jones, J.S. Kinnersley, C. Marquardt, K. Sato, M. Takahashi. 2001. The quasi-biennial oscillation. *Rev. Geophys.* 39:179-229. doi: 10.1029/1999rg000073.
8. Bilichak, A., Y. Illynskyy, J. Hollunder, and I. Kovalchuk. 2012. The Progeny of *Arabidopsis thaliana* Plants Exposed to Salt Exhibit Changes in DNA Methylation, Histone Modifications and Gene Expression. *PLoS ONE* 7:e30515. doi:10.1371/journal.pone.0030515.
9. Bonduriansky, R. and T. Day. 2009. Nongenetic inheritance and its evolutionary implications. *Annu. Rev. Ecol., Evol. Syst.* 40:103-125.
10. Burghardt, L.T., B.R. Edwards, K. Donohue. 2016. Multiple paths to similar germination behavior in *Arabidopsis thaliana*. *New Phyt.* 209:1301-1312. doi: 10.1111/nph.13685.
11. Case, A. L., E. P. Lacey, and R. G. Hopkins. 1996. Parental effects in *Plantago lanceolata* L. II. Manipulation of grandparental temperature and parental flowering time. *Heredity* 76:287-295.



12. Chen, M., MacGregor, D.R., Dave, A., Florance, H., Moore, K., Paszkiewicz, K., Smirnov, N., Graham, I.A. and Penfield, S., 2014. Maternal temperature history activates Flowering Locus T in fruits to control progeny dormancy according to time of year. *Proceedings of the National Academy of Sciences*. *111*(52), pp.18787-18792.
13. Colicchio, J. 2017. Transgenerational effects alter plant defence and resistance in nature. *J. Evol. Biol.* *30*:664-680. doi: 10.1111/jeb.13042.
14. Colicchio, J., F. Miura, J. Kelly, T. Ito, L. Hileman. DNA methylation and gene expression in *Mimulus guttatus*. 2015. *BMC Genomics* *16*:507. doi: 10.1186/s12864-015-1668-0.
15. Conrath, U., G. J. Beckers, C. J. Langenbach, and M. R. Jaskiewicz. 2015. Priming for enhanced defense. *Annu Rev Phytopathol* *53*:97-119.
16. Daly, C., W. P. Gibson, G. H. Taylor, G. L. Johnson, and P. Pasteris. 2002. A knowledge-based approach to the statistical mapping of climate. *Climate Research* *22*:99-113.
17. Dantzer, B., B. Dantzer, A. E. M. Newman, A. E. M. Newman, R. Boonstra, R. Boonstra, R. Palme, R. Palme, S. Boutin, S. Boutin, M. M. Humphries, M. M. Humphries, A. G. McAdam, and A. G. McAdam. 2013. Density Triggers Maternal Hormones That Increase Adaptive Offspring Growth in a Wild Mammal. *Science*. *340*:1215-1217. doi: 10.1126/science.1235765.
18. Day & Bonduriansky. 2011. A unified approach to the evolutionary consequences of genetic and non-genetic inheritance. *Am Nat.* *178*: E18-E36. doi: 10.1086/660911.
19. Dey, S., x, S.R. and Teotonio, H., 2016. Adaptation to temporally fluctuating environments by the evolution of maternal effects. *PLoS biology*, *14*(2), p.e1002388.
20. Donaldson-Matasci, M., C. Bergstrom, and M. Lachman. 2013. When unreliable cues are good enough. *Am. Nat.* *182*: 313-327.
21. Donelson, J.M., S. Salinas, P.L. Munday, L.N.S. Shama. 2018. Transgenerational plasticity and climate change experiments: where do we go from here? *Glob. Change. Biol.* *24*:13-34. doi: 10.1111/gcb.13903.
22. Donohue, K. 2009. Completing the cycle: maternal effects as the missing link in plant life histories. *Phil. Trans. R. Soc. B.* *364*:1059-1074. doi: 10.1098/rstb.2008.0291.
23. Ellenburg, W.L., R.T. McNider, J.F. Cruise, J.R. Christy. 2016. Towards an understanding of the Twentieth-Century cooling trend in the southeastern United States: biogeophysical impacts of land-use change. *Earth Interactions* *20*. doi: 10.1175/ei-d-15-0038.1.
24. English, S., I. Pen, N. Shea, and T. Uller. 2015. The information value of non-genetic inheritance in plants and animals. *PloS One* *10*:e0116996. doi:10.1371/journal.pone.0116996.
25. Falconer, D. S. 1981. *Introduction to Quantitative Genetics*. London: Longman.
26. Fisher, R.A. 1930. *The Genetical Theory of Natural Selection*. Clarendon, Oxford.
27. Furrow, R. and M. Feldman. 2014. Genetic variation and the evolution of epigenetic regulation. *Evolution* *68*: 673-683.
28. Galloway, L., J. Etterson, & McGlothlin. 2009. Contribution of direct and maternal genetic effects to life-history evolution. *New Phytol.* *183*:826-838. doi: 10.1111/j.1469-8137.2009.02939.x
29. Ganguly, D.R., P.A. Crisp, S.R. Eichten, B.J. Pogson. 2017. The Arabidopsis DNA Methylome is Stable Under Transgenerational Drought Stress. *Plant Phys.* *175*:1893-1912. doi: 10.1104/pp.17.00744.

30. Ghalambor, C.K., J.K. McKay, S.P. Carroll, & D.N. Reznick. 2007. Adaptive versus non-adaptive phenotypic plasticity and the potential for contemporary adaptation in new environments. *Funct. Ecol.* 21:394-407.
31. Graham, J.K., Smith, M.L. and Simons, A.M., 2014. Experimental evolution of bet hedging under manipulated environmental uncertainty in *Neurospora crassa*. *Proc. R. Soc. B.* 281(1787): pp.20140706.
32. Greenspoon, P. and H. Spencer. 2018. The evolution of epigenetically mediated transgenerational plasticity in a subdivided population. *Evolution*. doi: 10.1111/evo.13619.
33. Groot, M.P., Kubisch A., Ouborg, N.J., Pagel, J., Schmid, K.J., Verger, P., Lampei, C. 2017. Transgenerational effects of mild heat in *Arabidopsis thaliana* show strong genotype specificity that is explained by climate at origin. *New Phyt.* doi: 10.1111/nph.14642.
34. Halley, J. 1996. Ecology, evolution, and 1/f noise. *Trends Ecol. Evol.* 11:33-37.
35. Herman, J. J. and S. E. Sultan. 2011. Adaptive transgenerational plasticity in plants: case studies, mechanisms, and implications for natural populations. *Front. Plant Sci.* 2:1-10. doi: 10.3389/fpls.2011.00102.
36. Herman, J. J. and S. E. Sultan. 2016. DNA methylation mediates genetic variation for adaptive transgenerational plasticity. *Proc. R. Soc B.* 283: 20160988. Doi: 10.1098/rspb.2016.0988.
37. Herman, J. J., S. E. Sultan, T. Horgan-Kobelski, and C. Riggs. 2012. Adaptive transgenerational plasticity in an annual plant: Grandparental and parental drought stress enhance performance of seedlings in dry soil. *Integr. Comp. Biol.* 52:77-88.
38. Herman, J.J., H.G. Spencer, K. Donohue, & S.E. Sultan. 2014. How stable 'should' epigenetic modifications be? Insights from adaptive plasticity and bet hedging. *Evolution* 68:632-643. doi: 10.1111/evo.12324.
39. Holeski, L. M., G. Jander, and A. A. Agrawal. 2012. Transgenerational defense induction and epigenetic inheritance in plants. *Trends Ecol. Evol.* 27:618-626.
40. Holeski, L.M. 2007. Within and between generation phenotypic plasticity in trichome density of *Mimulus guttatus*. *J. Evol. Biol.* 20:2092-2100. doi: 10.1111/j.1420-9101.2007.01434.x.
41. Hourii-Zeevi, L. and Rechavi, O., 2017. A matter of time: small RNAs regulate the duration of epigenetic inheritance. *Trends in Genetics.* 33(1), pp.46-57.
42. Hoyle, R. B. and T. H. Ezard. 2012. The benefits of maternal effects in novel and in stable environments. *J R Soc Interface* 9:2403-2413.
43. Jablonka, E. 2013. Epigenetic inheritance and plasticity: The responsive germline. *Prog. Biophys. Mol. Biol.* 111:99-107.
44. Kerdaffrec, E. & M. Nordborg. 2017. The maternal environment interacts with genetic variation in regulating seed dormancy in Swedish *Arabidopsis thaliana*. *PLoS ONE* 12: e0190242. doi: 10.1371/journal.pone.0190242.
45. Knappenberger, P.C., P.J. Michaels, R.E. Davis. 2001. Nature of observed temperature changes across the United States during the 20<sup>th</sup> century. *Climate Res.* 17:45-53.
46. Kooyers, N.J. 2015. The evolution of drought escape and avoidance in natural herbaceous populations. *Plant Sci.* 234:155-162. doi: 10.1016/j.plantsci.2015.02.012.
47. Kuijper, B. and R. B. Hoyle. 2015. When to rely on maternal effects and when on phenotypic plasticity? *Evolution* 69:950-968.

48. Kuijper, B., R. A. Johnstone, and S. Townley. 2014. The evolution of multivariate maternal effects. *PLoS Comput. Biol.* 10:e1003550.
49. Lacey, E. & D. Herr. 2000. Parental effects in *Plantago lanceolata* L. III. Measuring parental temperature effects in the field. *Evolution* 54:1207-1217.
50. Lachmann, M. and E. Jablonka. 1996. The inheritance of phenotypes: an adaptation to fluctuating environments. *J. of Theor. Biol.* 181:1-9.
51. Leimar, O. and J. M. McNamara. 2015. The evolution of transgenerational integration of information in heterogeneous environments. *Am. Nat.* 185:E55-E69. Doi: 10.1086/679575.
52. Lopez Sanchez, A., J. H. Stassen, L. Furci, L. M. Smith, and J. Ton. 2016. The role of DNA (de)methylation in immune responsiveness of *Arabidopsis*. *Plant J.* doi: 10.1111/tpj.13252.
53. Lorentz, E. The circulation of the atmosphere. 1966. 2017 *Amer. Scientist* 54:402-420.
54. Mantua, N. & S. Hare. 2002. The Pacific Decadal Oscillation. *J. Oceanography* 58:35-44.
55. Mousseau, T. A. and C. W. Fox. 1998. *Maternal effects as adaptations*. Oxford University Press, New York.
56. Newman, M., M.A. Alexander, T.R. Ault, K.M. Cobb, C. Deser, E. Di Lorenzo, N.J. Mantua, A.J. Miller, S. Minobe, H. Nakamura, N. Schneider, D.J. Vimont, A.S. Phillips, J.D. Scott & C.A. Smith. 2016. The Pacific Decadal Oscillation, revisited. 2016. *J. Climate* 29:4399-4427.
57. Nicotra, A. B., O. K. Atkin, S. P. Bonser, A. M. Davidson, E. J. Finnegan, U. Mathesius, P. Poot, M. D. Purugganan, C. L. Richards, F. Valladares, and M. v. Kleunen. 2010. Plant phenotypic plasticity in a changing climate. *Trends Plant Sci.* 15:684-692.
58. Pajoro, A., E. Severing, G.C. Angenent, & R.G. H. Immink. 2017. Histone H3 lysine 36 methylation affects temperature-induced alternative splicing and flowering in plants. *Genome Biology.* 18:102. doi: 10.1186/s13059-017-1235-x.
59. PRISM Climate Group, Oregon State University, <http://prism.oregonstate.edu>, created 4 Feb 2004.
60. Prizak, R., T. H. Ezard, and R. B. Hoyle. 2014. Fitness consequences of maternal and grandmaternal effects. *Ecol. and Evol.* 4:3139-3145.
61. Proulx, S. and H. Teotonio. 2017. What kind of maternal effects can be selected for in fluctuating environments? *Am Nat.* 189:E118-E137. doi: 10.1086/691423.
62. Quantum GIS geographic information system. 2012. Open source geospatial foundation project. Free Software Foundation, India.
63. Räsänen, K. and L. Kruuk. 2007. Maternal effects and evolution at ecological timescales. *Funct. Ecol.* 21:408-421.
64. Rasmann, S., M. De Vos, C. L. Casteel, D. Tian, R. Halitschke, J. Y. Sun, A. A. Agrawal, G. W. Felton, and G. Jander. 2012. Herbivory in the Previous Generation Primes Plants for Enhanced Insect Resistance. *Plant Physiol.* 158:854-863.
65. Rechavi, O., G. Minevich, and O. Hobert. 2011. Transgenerational inheritance of an acquired small RNA-based antiviral response in *C. elegans*. *Cell* 147:1248-1256.
66. Roach, D., and Wulff, R. 1987. Maternal effects in plants. *Annu. Rev. Ecol. Syst.* 18, 209-235.

67. Scheiner, S. 2016. Habitat Choice and Temporal Variation Alter the Balance between Adaptation by Genetic Differentiation, a Jack-of- All-Trades Strategy, and Phenotypic Plasticity. *Am. Nat.* 187:633-646. doi: 10.1086/685812.
68. Scheiner, S. M. 1993. Genetics and Evolution of Phenotypic Plasticity. *Annu. Rev. Ecol. Syst.* 24:35-68.
69. Schlichting, C. and M. Pigliucci. 1998. Phenotypic evolution: a reaction norm perspective. Sinauer, Sunderland, Massachusetts.
70. Schmitt, J., J. Niles, and R. Wulff. 1992. Norms of reaction of seed traits to maternal environments in *Plantago lanceolata* *Am. Nat.* 139:451-466.
71. Shea, N., I. Pen, and T. Uller. 2011. Three epigenetic information channels and their different roles in evolution. *J. Evol. Biol.* 24:1178-1187.
72. Sikkink, K.L., Ituarte, C.M., Reynolds, R.M., Cresko, W.A. and Phillips, P.C., 2014. The transgenerational effects of heat stress in the nematode *Caenorhabditis remanei* are negative and rapidly eliminated under direct selection for increased stress resistance in larvae. *Genomics.* 104(6):438-446.
73. Slaughter, A., X. Daniel, V. Flors, E. Luna, B. Hohn, and B. Mauch-Mani. 2012. Descendants of Primed *Arabidopsis* Plants Exhibit Resistance to Biotic Stress. *Plant Physiol.* 158:835-843.
74. Stjernman, M. and T. J. Little. 2011. Genetic variation for maternal effects on parasite susceptibility. *J. Evol. Biol.* 24:2357-2363.
75. Sultan, S. E. 1996. Phenotypic plasticity for offspring traits in *Polygonum persicaria*. *Ecology* 77:1791-1807.
76. Sultan, S. E. 2015. *Organism and Environment: Ecological Development, Niche Construction, and Adaptation.* Oxford University Press, New York, NY, United States of America.
77. Sultan, S. E. and H. G. Spencer. 2002. Metapopulation structure favors plasticity over local adaptation. *Am. Nat.* 160:271-283.
78. Sultan, S. E., K. Barton, and A. M. Wilczek. 2009. Contrasting patterns of transgenerational plasticity in ecologically distinct congeners. *Ecology* 90:1831-1839.
79. Suter L, Widmer A. 2013a. Environmental heat and salt stress induce transgenerational phenotypic changes in *Arabidopsis thaliana*. *PLoS ONE* 8: e60364. doi:10.1371/journal.pone.0060364.
80. Suter L, Widmer A. 2013b. Phenotypic effects of salt and heat stress over three generations in *Arabidopsis thaliana*. *PLoS ONE* 8: e80819. doi:10.1371/journal.pone.0080819.
81. Szendro, P. G. Vincze, A. Szasz. Pink-noise behaviour of biosystems. 2001. *European Biophys. J.* 30:227-231.
82. Tufto, J. 2015. Genetic evolution, plasticity, and bet-hedging as adaptive responses to temporally autocorrelated fluctuating selection: A quantitative genetic model. *Evolution* 69:2034-2049.
83. Uller, T. 2008. Developmental plasticity and the evolution of parental effects. *Trends Ecol. Evol.* 23:432-438.
84. Uller, T., S. English, and I. Pen. 2015. When is incomplete epigenetic resetting in germ cells favoured by natural selection? *Proc. R. Soc. B.* 282:20150682. Doi: 10.1098/rspb.2015.0682.

85. Vastenhouw, N. L., K. Brunschwig, K. L. Okihara, F. Muller, M. Tijsterman, and R. H. Plasterk. 2006. Gene expression: long-term gene silencing by RNAi. *Nature* 442:882.
86. Verhoeven, K. J. F. and T. P. van Gurp. 2012. Transgenerational effects of stress exposure on offspring phenotypes in apomictic dandelion. *PLoS ONE* 7:e38605.
87. Walsh, M. R., T. Castoe, J. Holmes, M. Packer, K. Biles, M. Walsh, S. B. Munch, and D. M. Post. 2016. Local adaptation in transgenerational responses to predators. *Proc. R. Soc. B.* 283. 20152271. doi: 10.1098/rspb.2015.2271.
88. Whittle, C., S. Otto, M. Johnston, and J. Krochko. 2009. Adaptive epigenetic memory of ancestral temperature regime in *Arabidopsis thaliana*. *Botany* 87:650-657.
89. Wibowo, A., C. Becker, G. Marconi, J. Durr, J. Price, J. Hagmann, R. Papareddy, H. Putra, J. Kageyama, J. Becker, D. Weigel, and J. Gutierrez-Marcos. 2016. Hyperosmotic stress memory in *Arabidopsis* is mediated by distinct epigenetically labile sites in the genome and is restricted in the male germline by DNA glycosylase activity. *Elife* 5:e13546. doi: 10.7554/eLife.13546.
90. Yang, S., Z. Li, J. Yu, X. Hu, W. Dong, & S. He. 2018. El Niño Southern Oscillation and its Impact in the Changing Climate. *National Science Review* doi:10.1090/nsr/nwy046.
91. Yin, J., M. Zhou, Z. Lin, Q. Li, & Y. Zhang. 2019. Transgenerational effects benefit offspring across diverse environments: a meta-analysis in plants and animals. *Ecology Letters* doi:10.1111/ele.13373.
92. Banta, J., D. Cruzan, M. Pigliucci. 2007. Evidence of local adaptation to coarse-grained environmental variation in *Arabidopsis thaliana*. *Evolution* 61:2419-2432. doi: 10.1111/j.1558-5646.2007.00189.x.

711 **Data Accessibility:** All modeling inputs and results are publicly available within the supplemental  
712 tables and code on github.

713

714

715

716

717

718

719

720

721

722

723

724 Table 1: Summary statistics of climatic patterns relevant to the evolution of within and  
725 transgenerational plasticity. Mean (s.d.). IASD: Inter-annual standard deviation (representative of  
726 how variable conditions are between years). ACF: Autocorrelation at lags 1, 2 and, 3.

727

|               | Mean       | IASD      | ResACF-1     | ACF-1        | ACF-2       | ACF-3       |
|---------------|------------|-----------|--------------|--------------|-------------|-------------|
| Precipitation | 763 (443)  | 145 (76)  | 0.02 (0.08)  | 0.04 (0.09)  | 0.05 (0.13) | 0.01 (0.09) |
| Spring Temp   | 10.4 (5.5) | 1.2 (0.2) | -0.04 (0.07) | -0.01 (0.08) | -0.04 (0.1) | 0.05 (0.09) |
| Summer Temp   | 21.2 (4.2) | 0.9 (0.2) | 0.17 (0.1)   | 0.24 (0.12)  | 0.09 (0.1)  | 0.11 (0.09) |

728

729

730

731

732

733

734

735

736

737

738

739

740

741

742

743

744

745

746

747

748

749 Table 2: Most common, second most common, and mean optimal plasticity values across all sites in  
 750 the US for precipitation and temperature models.

751

| Climate Term  |                       | Raw       |                | Residual  |               |
|---------------|-----------------------|-----------|----------------|-----------|---------------|
|               |                       | #1 / #2   | Mean (s.d.)    | #1 / #2   | Mean (s.d.)_  |
| Precipitation | <i>M</i>              | 0.1/0.2   | 0.094 (0.22)   | 0.1/0.2   | 0.036 (0.21)  |
|               | <i>G</i>              | 1/0       | 0.63 (0.40)    | 1/0       | 0.64 (0.40)   |
| Temperature   | <i>m<sub>EE</sub></i> | 0 / 0.1   | -0.016 (0.098) | 0 / -0.2  | -0.04 (0.11)  |
|               | <i>m<sub>EL</sub></i> | 0.1 / 0   | 0.057 (0.073)  | 0.1 / 0   | 0.045 (0.073) |
|               | <i>m<sub>LE</sub></i> | 0.1 / 0   | 0.096 (0.178)  | 0 / 0.1   | 0.042 (0.17)  |
|               | <i>m<sub>LL</sub></i> | 0.3 / 0.1 | 0.204 (0.133)  | 0.1 / 0.3 | 0.148 (0.117) |
|               | <i>w</i>              | 0.1 / 0   | 0.095 (0.072)  | 0.1 / 0   | 0.092 (0.072) |

752

753

754

755

756

757

758

759

760

761

762

763

764

765

766

767

768

769

770 Table 3: Correlations between the temperature inter-annual autocorrelations and the optimal  
771 transgenerational plasticity values.

772

|            | $m_{EE}$  | $m_{EL}$  | $m_{LE}$  | $m_{LL}$  |
|------------|-----------|-----------|-----------|-----------|
| EE ACF     | 0.757139  | -0.131583 | -0.049501 | -0.156768 |
| EL ACF     | -0.036229 | 0.5968488 | -0.069245 | -0.153818 |
| LE ACF     | 0.1256068 | -0.036048 | 1.3390581 | -0.067451 |
| LL ACF     | 0.0135772 | -0.017808 | -0.120773 | 0.9757164 |
| Within ACF | -0.067861 | -0.160476 | 0.0595802 | 0.0701295 |

773

774

775

776

777

778

779

780

781

782

783

784

785

786

787

788

789

790

791



792 Figure 1: Schematic depicting the ecological motivations (summer annual plants) and theoretical  
793 underpinnings for the evolutionary modeling of plasticity traits (A and C), and the types of  
794 environmental fluctuations that may influence their evolution. (A) Temperature plasticity model. In  
795 the abbreviations, **E** denotes the Early growing season (spring) and **L** denotes the late growing  
796 season (summer). The first letter represents the relevant season during the parental generation and  
797 the second letter represents the relevant season in the offspring generation (e.g., EL denotes effects  
798 of parental early growing season temperature on offspring phenotypes late in the growing season).  
799 Within generation developmental changes in response to early season environment (W) are also  
800 considered in this model. Additionally, the long-term average environmental conditions at a specific  
801 area determine the genetic baseline phenotype of an individual (G). (B) On the left we see an  
802 example of an environment with high within season autocorrelations for temperature (hot springs  
803 tend to be followed by hot summers), but low inter-annual autocorrelations (a hot year does not tend  
804 to be followed by another hot year) that selects for within generation plasticity but not  
805 transgenerational plasticity. On the right, a situation where spring and summer temperatures are not  
806 correlated with each other, but we do find that environmental oscillations lead to a string of warmer  
807 than average springs and cooler than average summers, in this situation transgenerational plasticity  
808 (EE and LL) but not within generation plasticity is expected to be optimal. (C) Precipitation  
809 plasticity model. The amount of precipitation experienced by an individual can lead to  
810 transgenerational effects in the next generation (I), as well as persist for two (TG) or three (TGG)  
811 generations. (D) On the left, relatively gradual decadal oscillations give value to transgenerational  
812 effects that persist for multiple seasons (I, TG, and TGG). On the right shorter period climatic  
813 oscillations may favor parental effects (I), but not multi-generation effects (TG or TGG).  
814

815 Figure 2: Maps depicting natural climatic variation across the conterminous US.

816

817 Figure 3: Distributions of optimal plasticity (A and B) and temperature (C-G) values across all 4km x

818 4km sites in the US. Histograms of optimal (A) precipitation transgenerational plasticity value ( $T$ ),

819 (B) precipitation multi-generation persistence ( $G$ ), (C) temperature spring (early season) -> spring

820 (early season) transgenerational plasticity ( $m_{EE}$ ), (D) temperature spring (early season) -> summer

821 (late season) transgenerational plasticity ( $m_{EL}$ ), (E) temperature summer (late season) -> spring(early

822 season) transgenerational plasticity ( $m_{LE}$ ), (F) temperature summer (late season) -> summer (late

823 season) transgenerational plasticity ( $m_{LL}$ ), and within generation temperature plasticity ( $W$ )

824

825 Figure 4: Maps coded to show patterns of variability for optimal precipitation (A-C) and temperature

826 (D-H) plasticity values across the US. (A) Optimal transgenerational plasticity values for the one-

827 generation transmission of precipitation level information. (B) Optimal grandparental

828 transgenerational plasticity values coded blue (green) or red (orange) based on the direction of effect

829 (positive or negative). White regions have an optimal multi-generation persistence ( $G$ ) of 0, while

830 red and blue both have optimal multigeneration persistence of 1, intermediate values ( $0 > G > 1$ ) in

831 orange and green. (C) The difference between optimal transgenerational plasticity values in the raw

832 vs. residual variant of the mode. Higher values suggest that the primary value associated with

833 transgenerational plasticity over the past 120 years has been associated with allowing individuals to

834 keep up with linearly changing precipitation patterns. (D) Optimal total levels of transgenerational

835 temperature plasticity  $((m_{EE} + m_{EL} + m_{LE} + m_{LL})/2)$ . (E) Optimal transgenerational plasticity of

836 most extreme positive transgenerational plasticity allele. (F) Optimal transgenerational plasticity of

837 lowest transgenerational plasticity allele. Regions in orange have at least one form of

838 transgenerational plasticity for which negative transgenerational effects increase fitness. (G) The  
839 difference between optimal transgenerational plasticity values in the raw vs. residual variant of the  
840 mode. Higher values suggest that the primary value associated with transgenerational plasticity over  
841 the past 120 years has been associated with allowing individuals to keep up with increasing  
842 temperature. (H) Optimal within generation plasticity (W) values.

843  
844 Figure 5: Fitness landscapes of transgenerational precipitation alleles for twelve sites across the US.  
845 Sites with low optimal parental effects (D and I) have only very subtle fitness differences associated  
846 with changes in the multigeneration persistence (Y-axis) due to the minor role in any form of  
847 transgenerational effect on fitness in these cases. More defined fitness peaks tend to occur in areas  
848 where more substantial transgenerational effects are optimal (E, G, J, K, L). In some rare cases,  
849 bimodal fitness landscapes arise (B) where lines with either positive (with high persistence) or  
850 negative (with low persistence) transgenerational persistence have higher fitness than lines with no  
851 transgenerational inheritance.

852  
853 Figure S1: Distribution of climatic summary statistics across the 481k 4x4km grids in the US. Dotted  
854 lines at 0 for autocorrelation histograms.

855  
856 Figure S2: Mosaic plot showing the frequency of specific combinations of optimal transgenerational  
857 effects and multi-generational persistence values. More subtle transgenerational effects more  
858 frequently only have a single generation of persistence ( $G=0$ ), while more extreme transgenerational  
859 effects tend to coincide with full transgenerational persistence ( $G=1$ ) where each of the prior three

860 years contribute equally. Additionally, positive transgenerational effects were more likely to have  
861 intermediate levels of persistence than negative transgenerational effects.

862

863 Figure S3: Figures demonstrating tradeoffs between classes of plasticity. (A) Tradeoffs between early-  
864 late (m12) and late-late (m22) transgenerational plasticity in relation to the autocorrelations in  
865 summer temperature. Generally, as inter-annual summer autocorrelations increase, so too does the  
866 frequency of minor and moderate early-late transgenerational plasticity. However, we also find that  
867 areas that favor higher levels of late-late transgenerational plasticity tend to favor lower levels of  
868 early-late plasticity compared to other sites with similar levels of temperature autocorrelation. (B)  
869 Within a single site there are many examples of localities where either early-late or late-late  
870 transgenerational plasticity lead to fitness increases relative to clones with no plasticity, but  
871 individuals expressing both forms of plasticity have the lowest fitness of all.

872

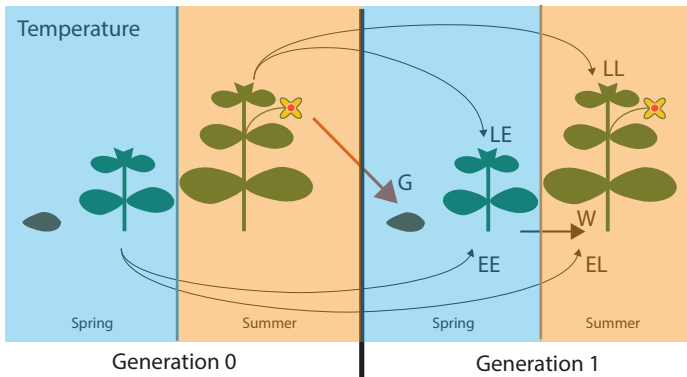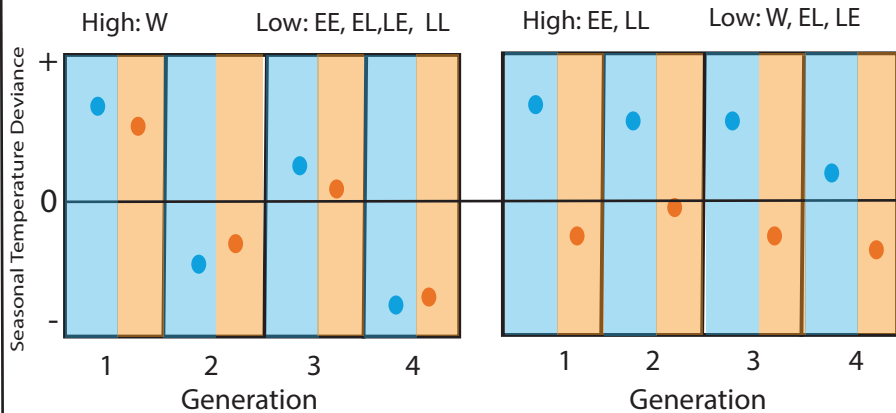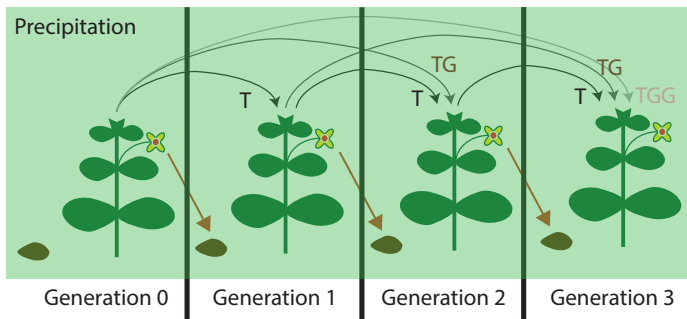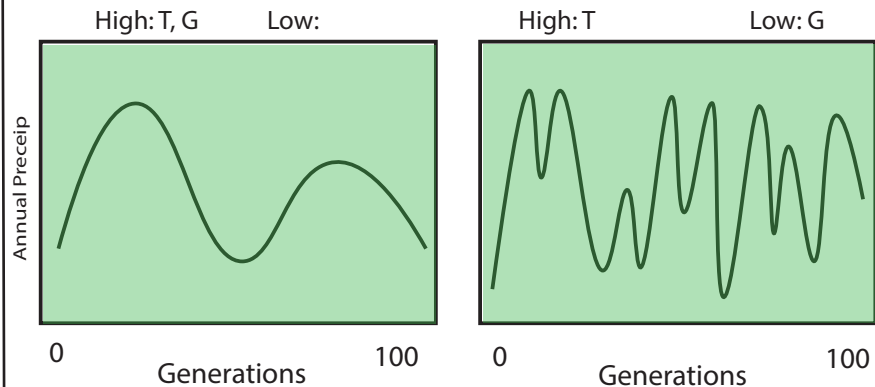

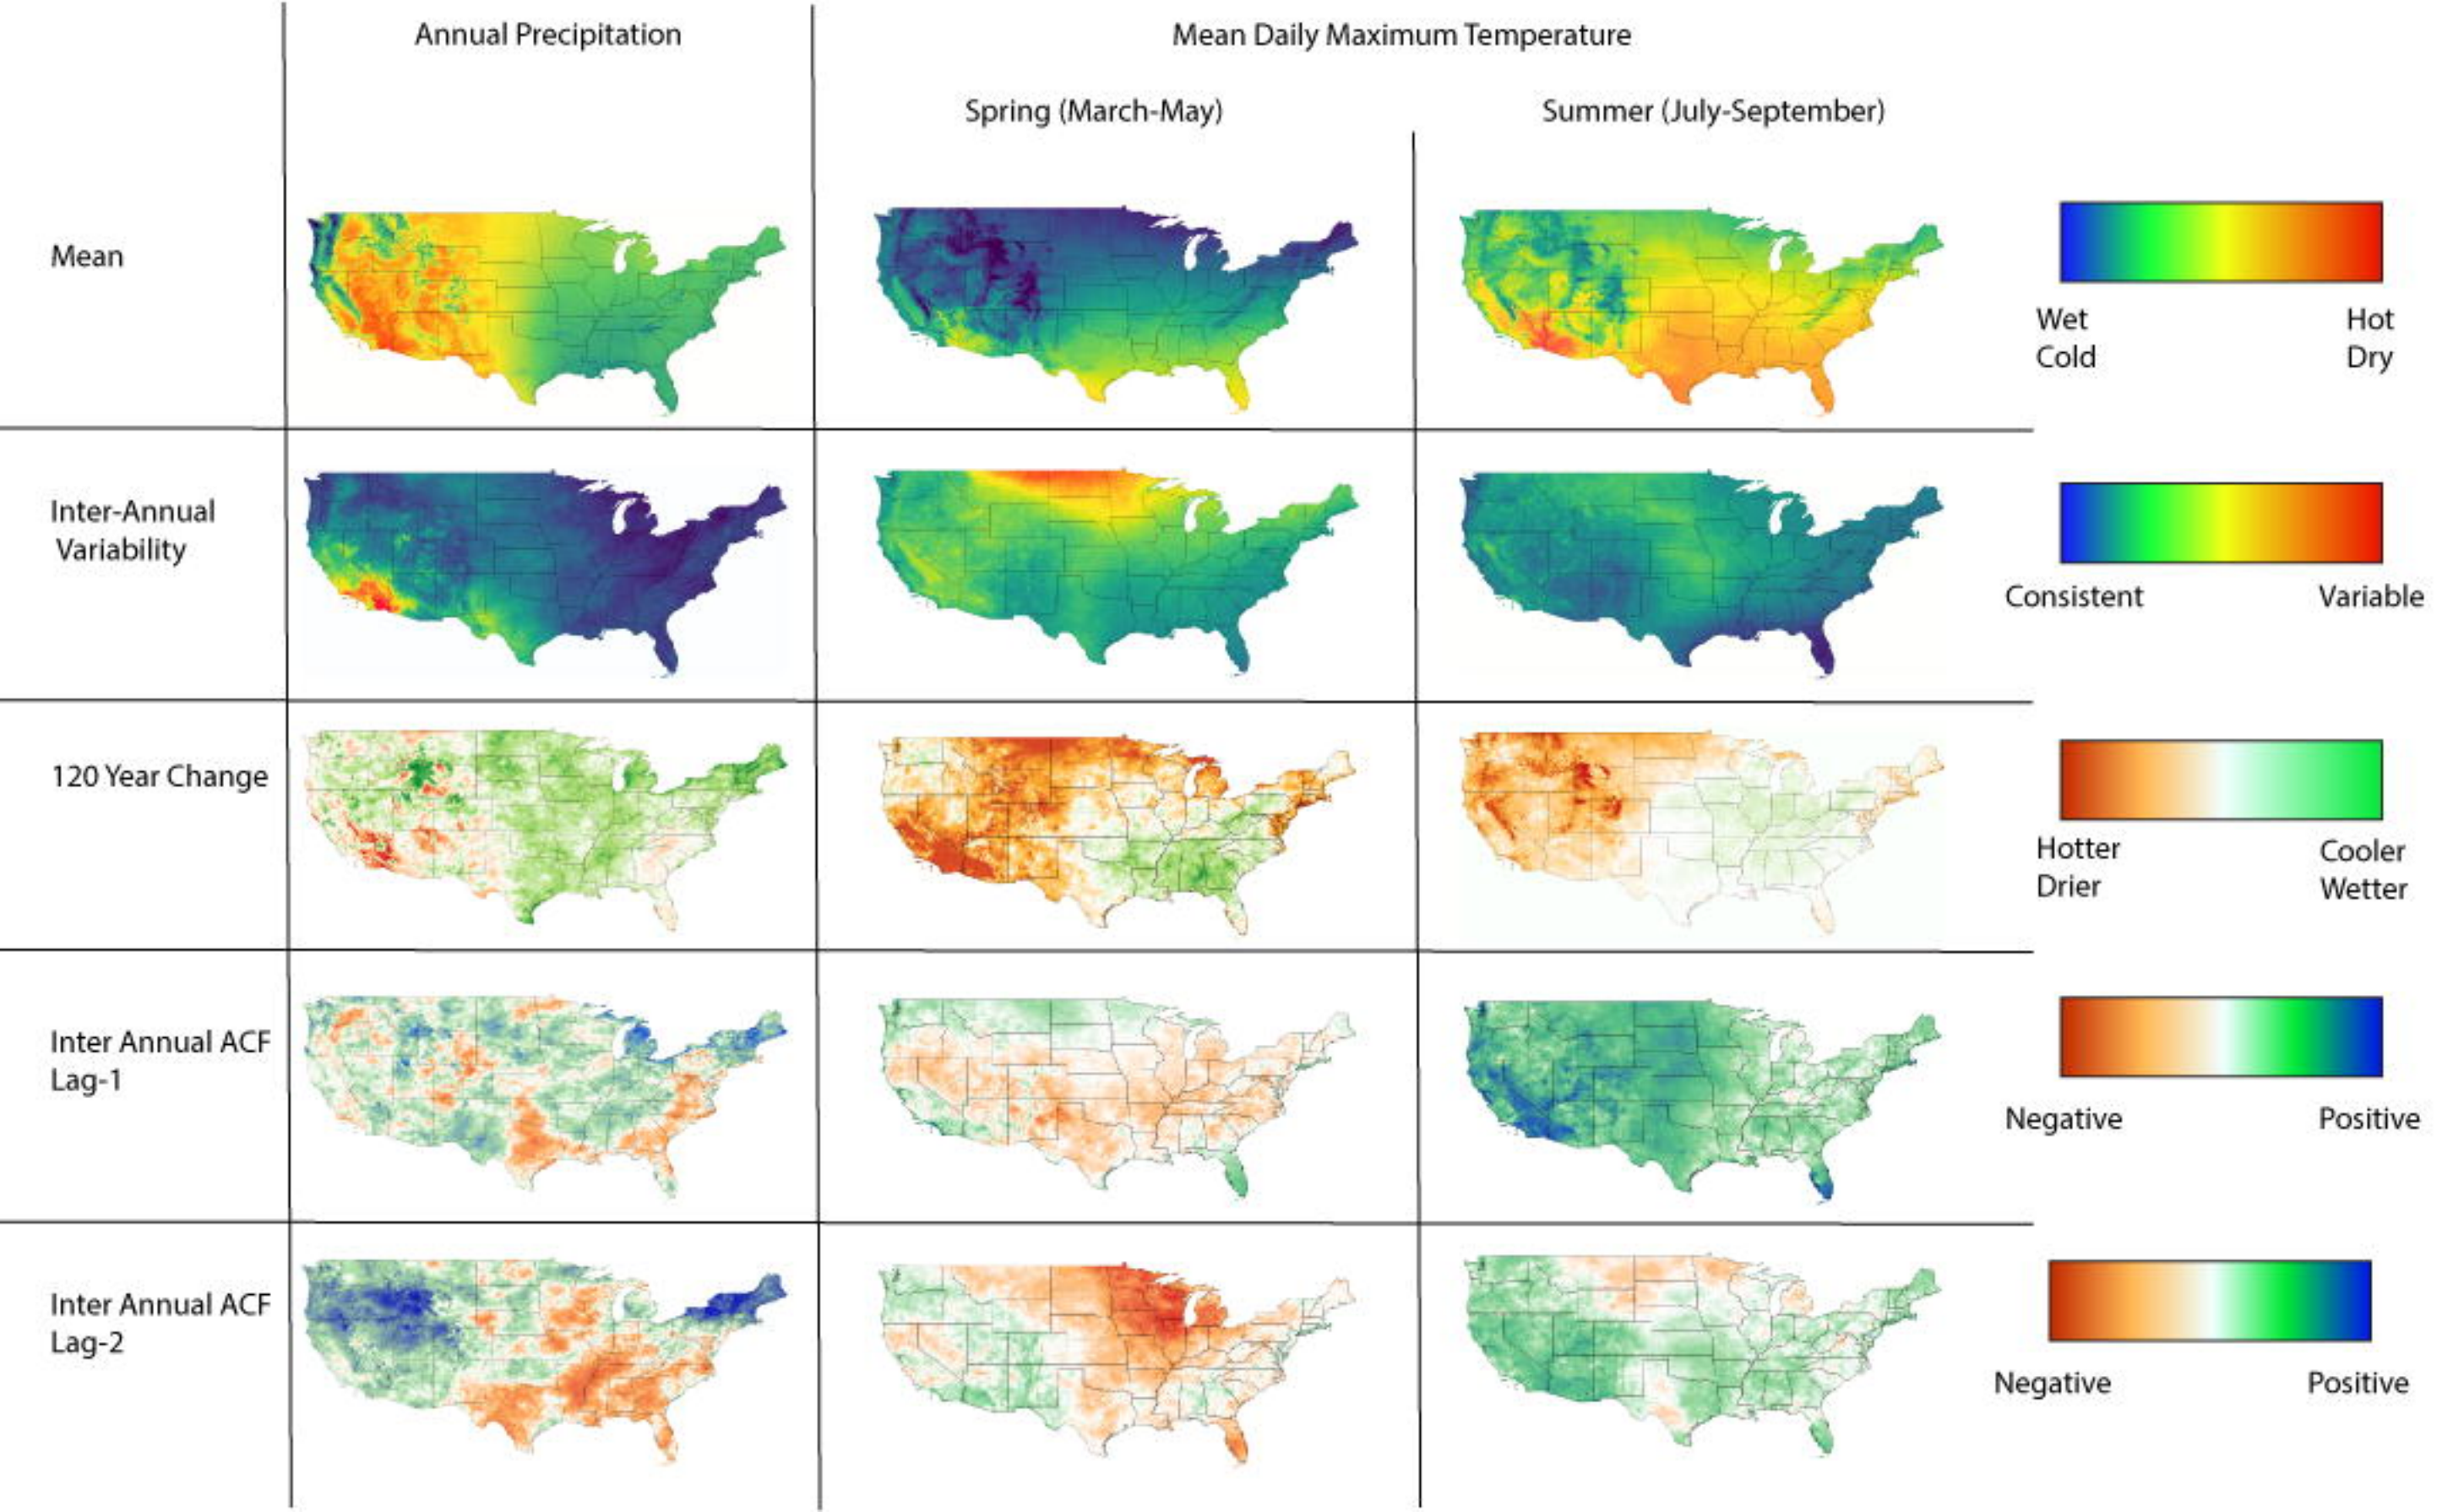

# Precipitation Plasticity Model

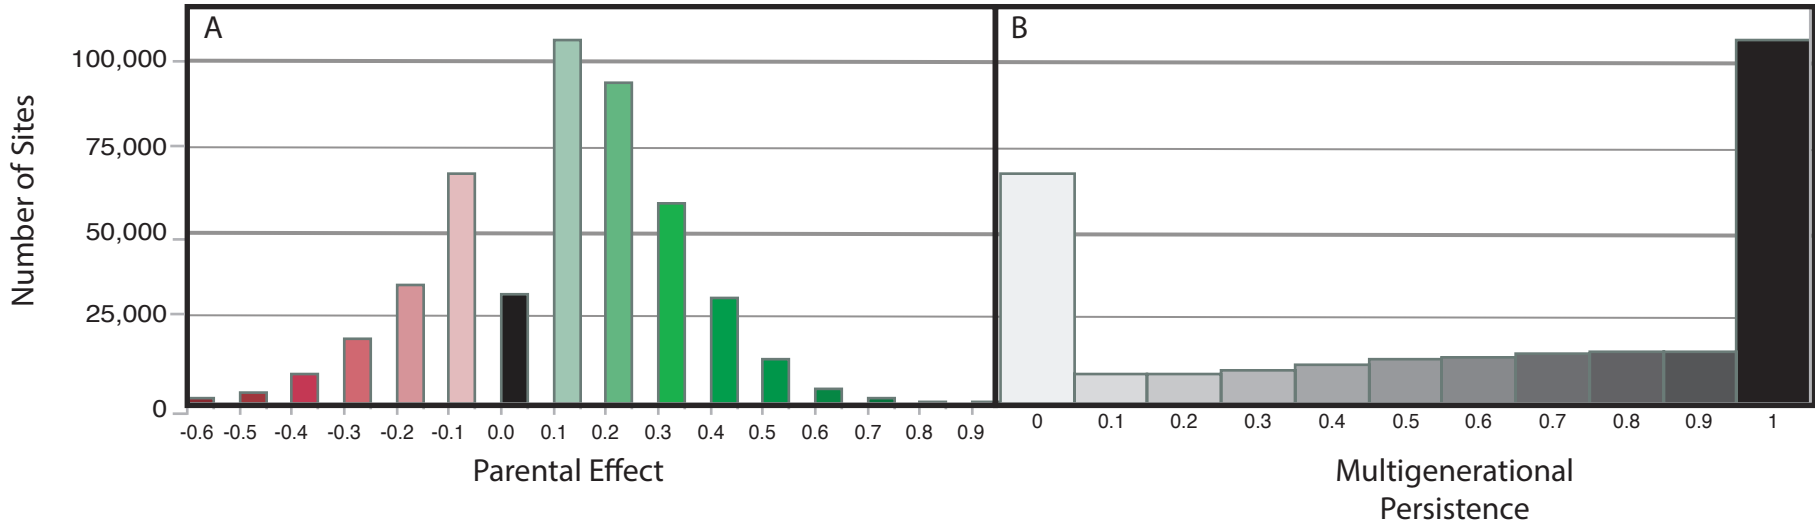

# Temperature Plasticity Model

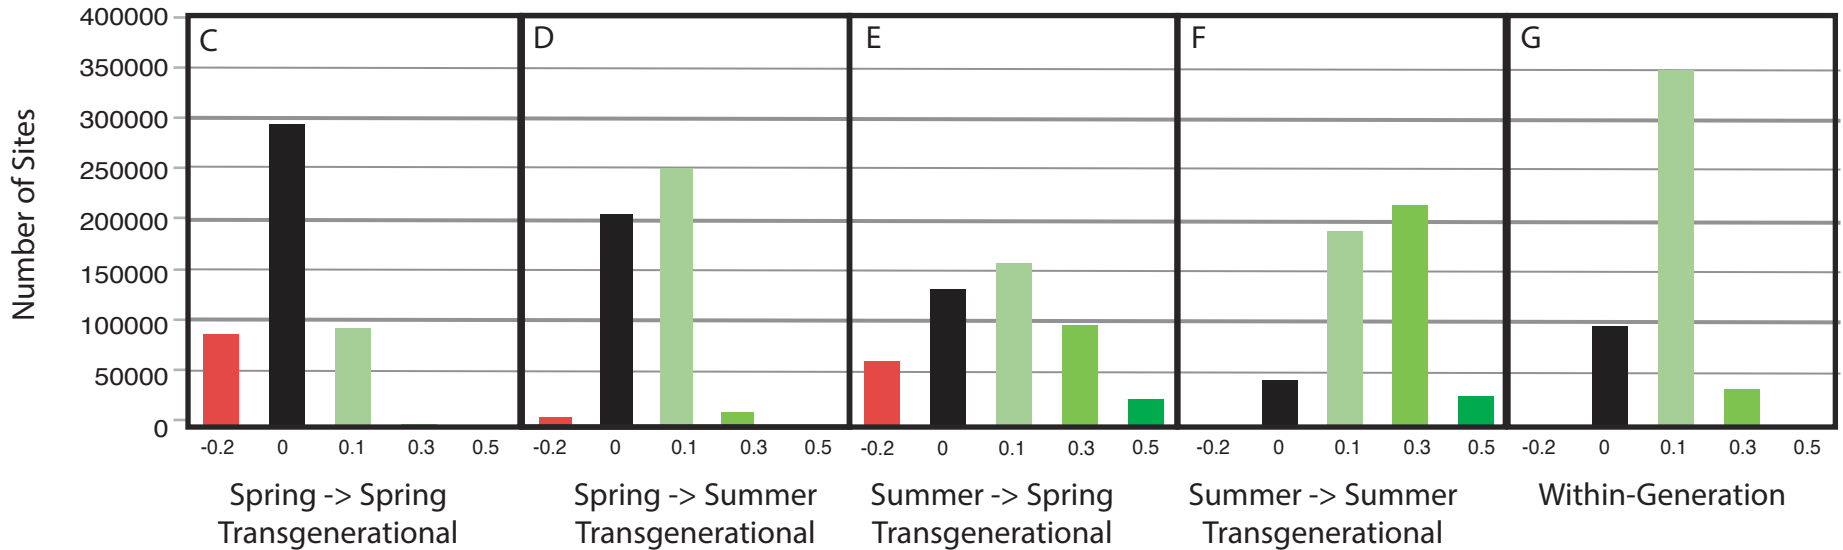

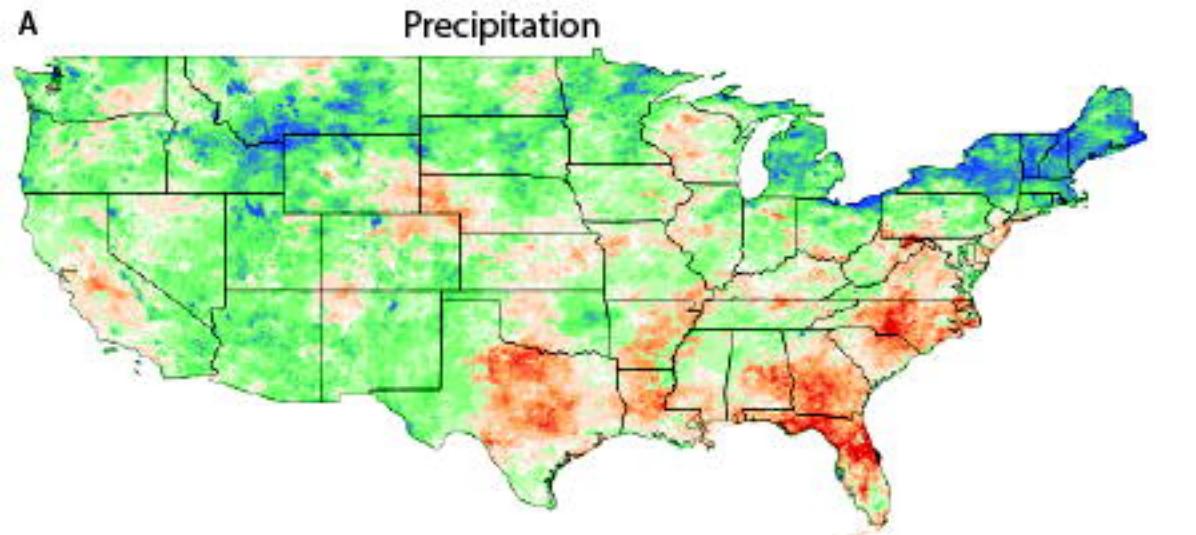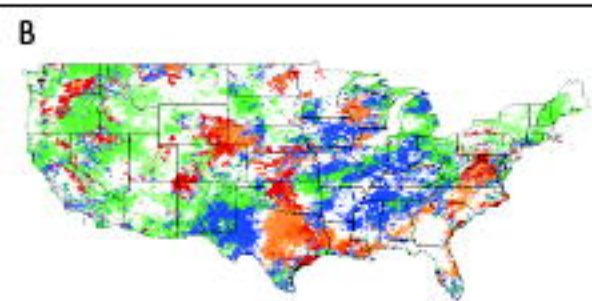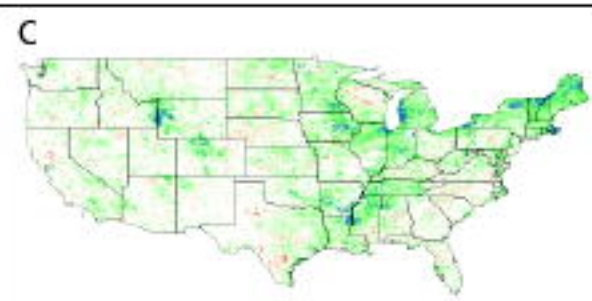

Plasticity Allele Value

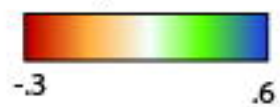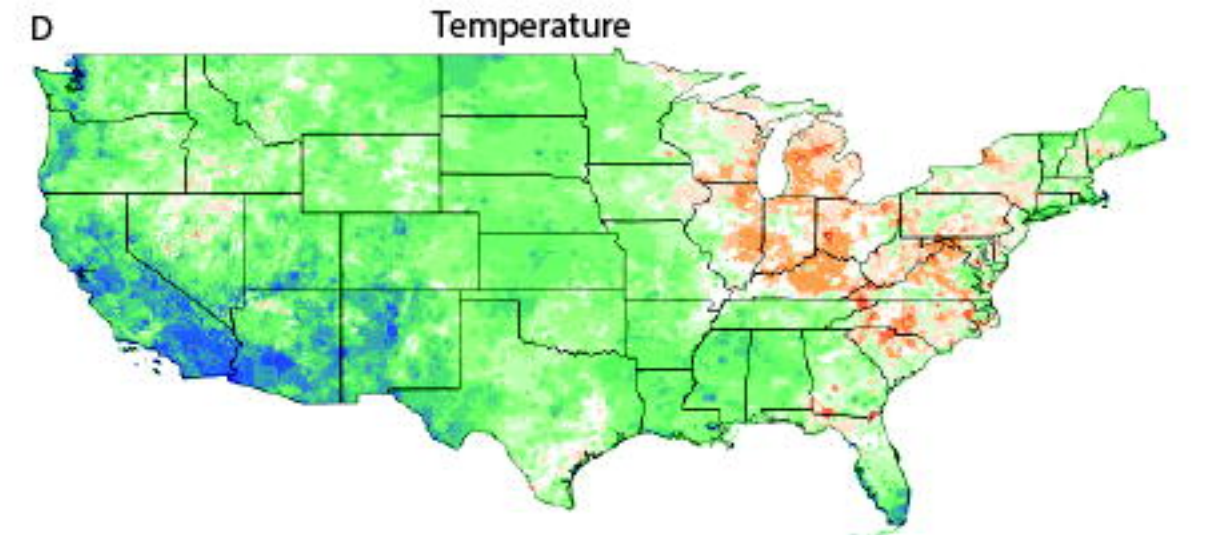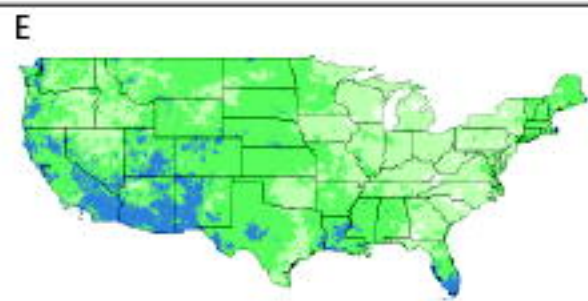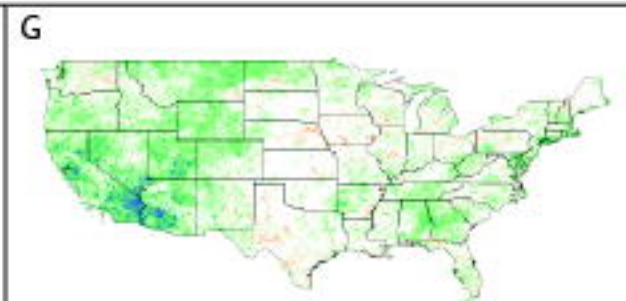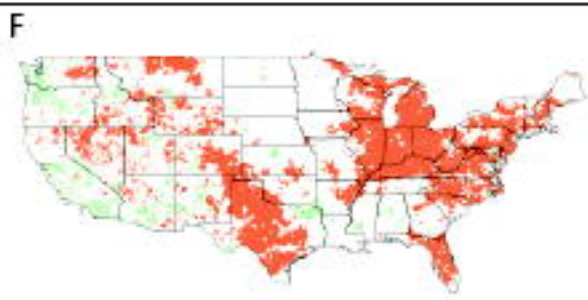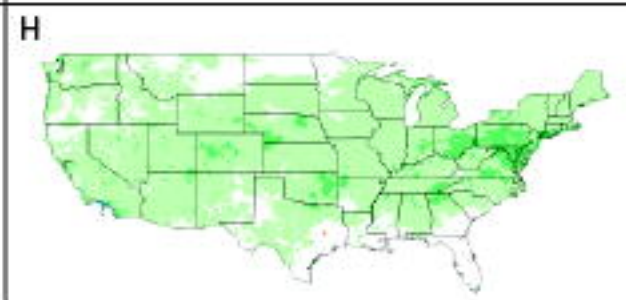



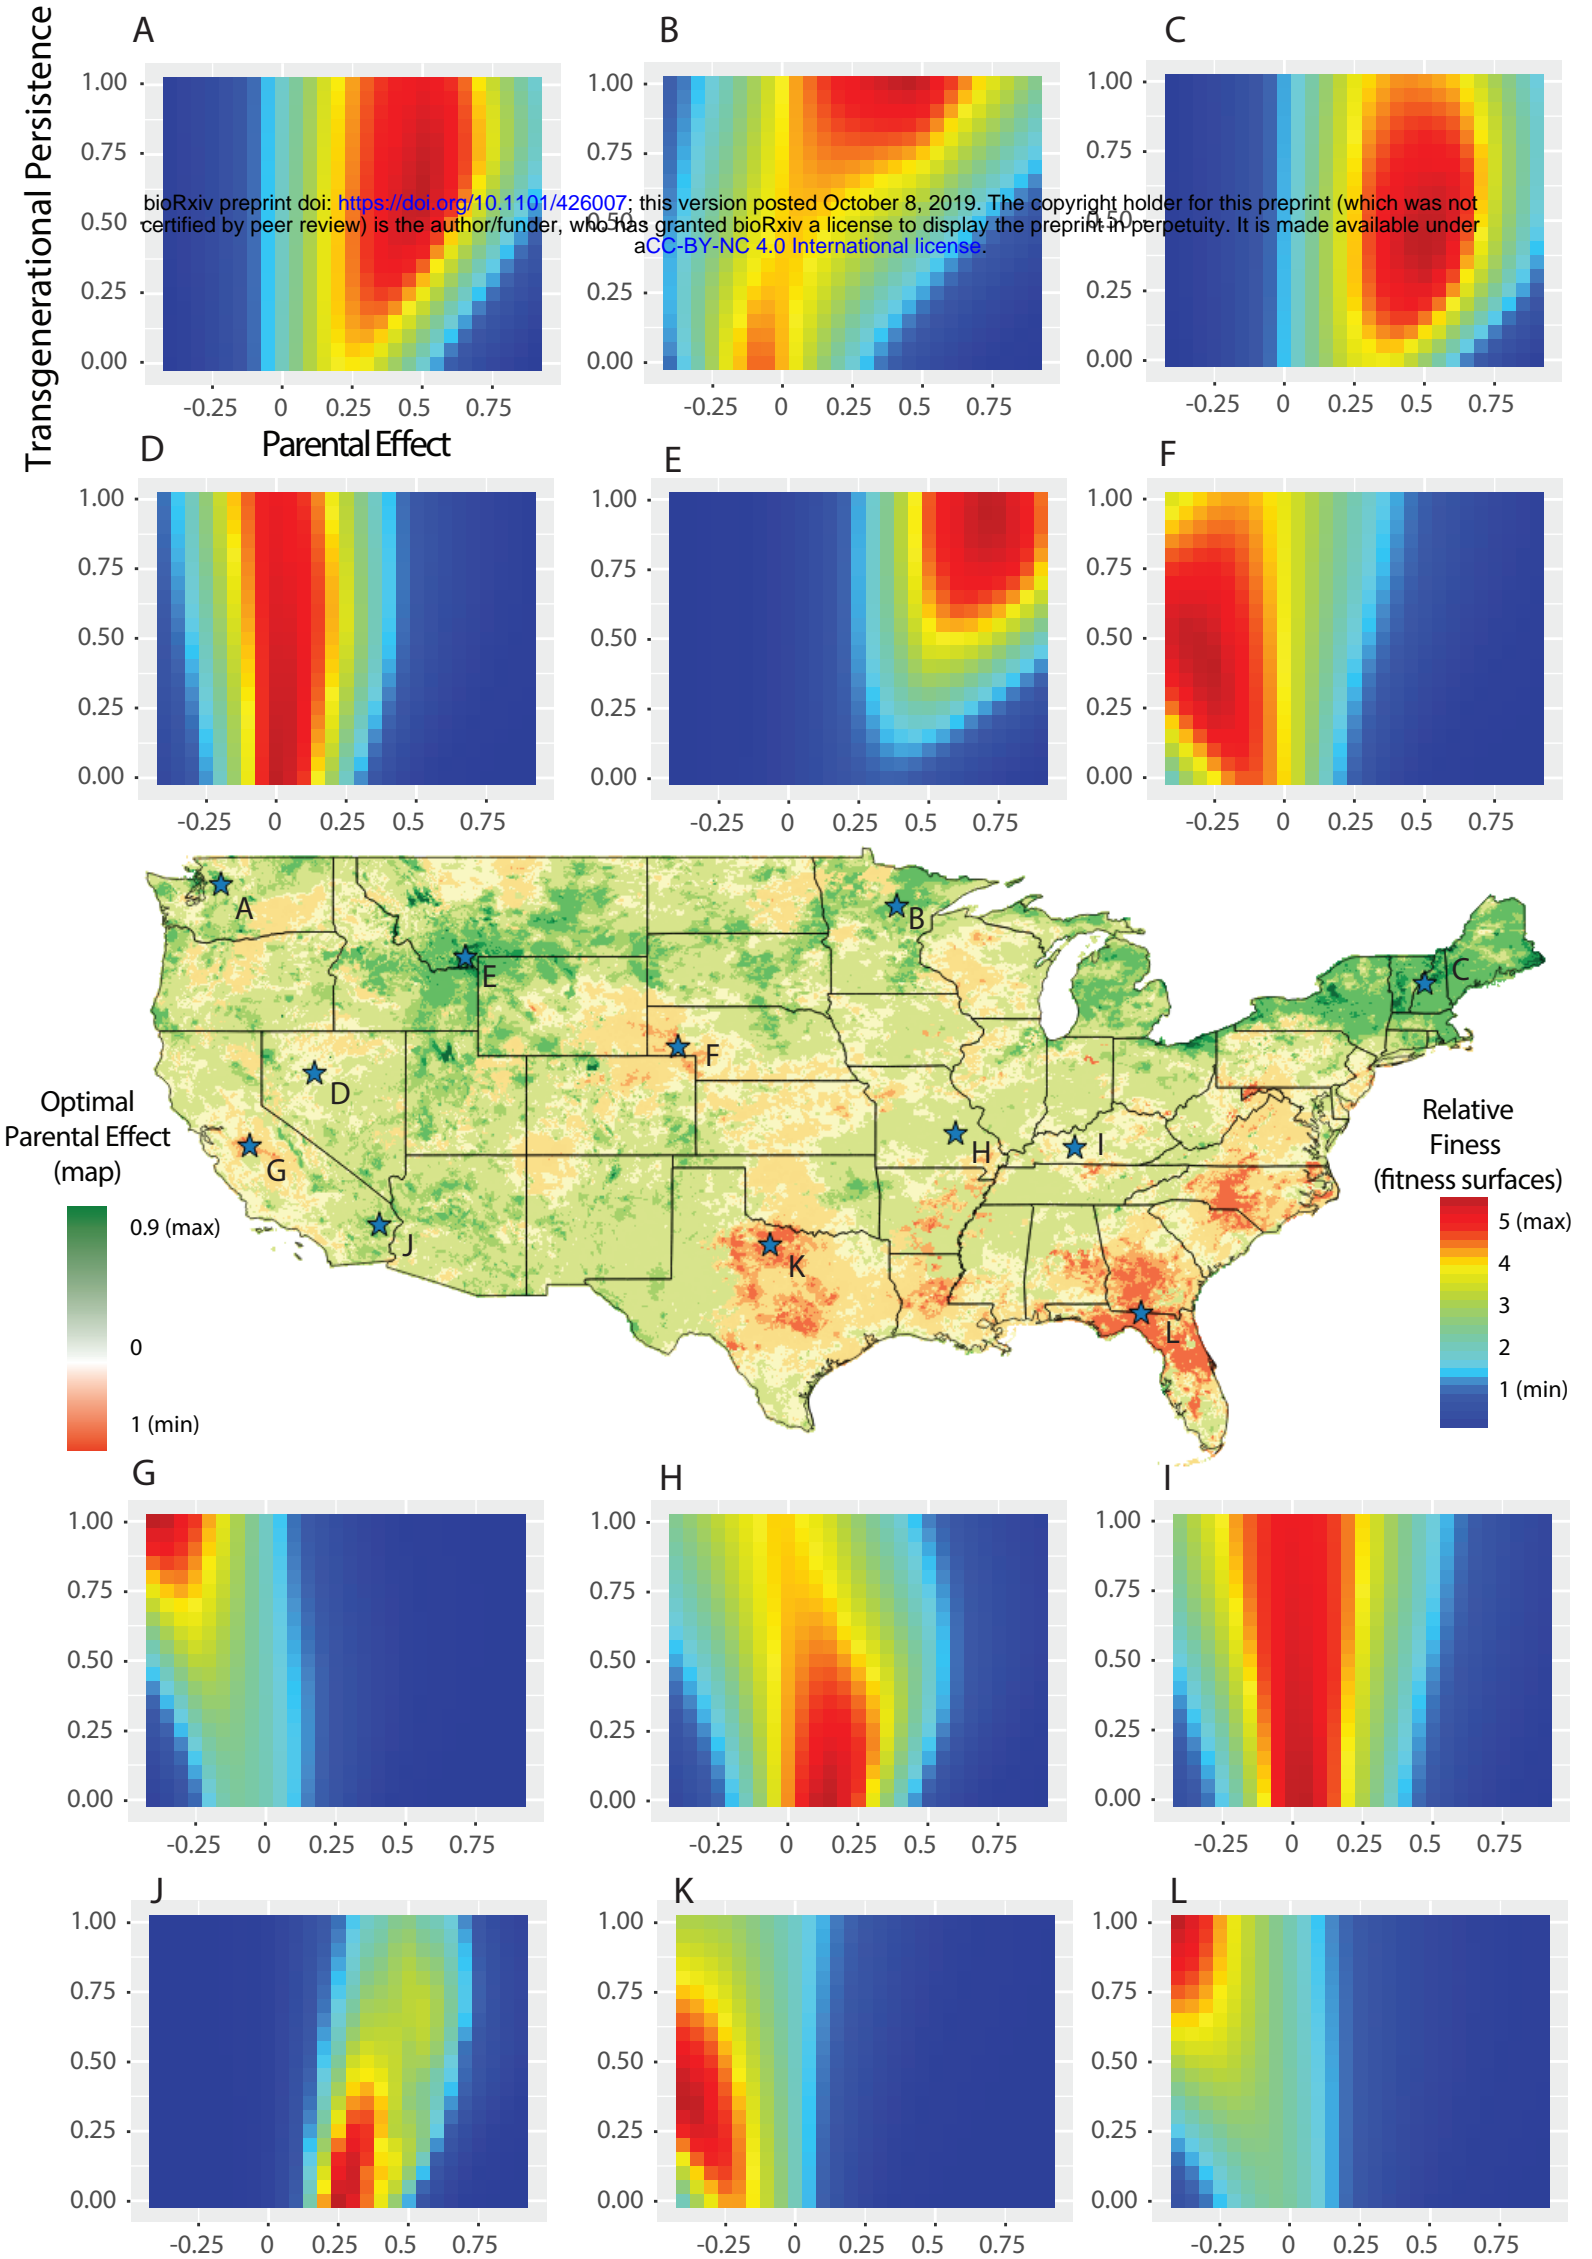

Source: https://www.biorxiv.org/content/10.1101/426007v3.full.pdf
